# Supplementary material for: Characteristic Volatile Fingerprints and Odor Activity Values in Different Citrus-Tea by HS-GC-IMS and HS-SPME-GC-MS
Source: PubMed Central journal article supplement (PMC7766395; doi:10.3390/molecules25246027), 2020-12-19
Supplement: molecules-25-06027-s001.pdf [file molecules-25-06027-s001.pdf]

## Supplementary Materials

**Table S1.** Information on the identified compounds of citrus-tea by HS-GC-IMS.

| NO. | Compound                 | CAS#          | Formula                                        | MW <sup>a</sup> | RI <sup>b</sup> | Rt <sup>c</sup> (sec) | Dt <sup>d</sup> [RIPrel] | Comment |
|-----|--------------------------|---------------|------------------------------------------------|-----------------|-----------------|-----------------------|--------------------------|---------|
| 1   | $\gamma$ -Decalactone    | C706149       | C <sub>10</sub> H <sub>18</sub> O <sub>2</sub> | 170.3           | 1538.1          | 1169.307              | 1.4715                   |         |
| 2   | Decanal                  | C112312       | C <sub>10</sub> H <sub>20</sub> O              | 156.3           | 1260.2          | 737.434               | 1.543                    | Monomer |
| 3   | Decanal                  | C112312       | C <sub>10</sub> H <sub>20</sub> O              | 156.3           | 1259.4          | 736.205               | 2.056                    | Dimer   |
| 4   | Phenylethyl acetate      | C103457       | C <sub>10</sub> H <sub>12</sub> O <sub>2</sub> | 164.2           | 1318.7          | 828.421               | 1.3119                   |         |
| 5   | Phenylacetic acid        | C103822       | C <sub>8</sub> H <sub>8</sub> O <sub>2</sub>   | 136.1           | 1283.9          | 774.321               | 1.3301                   |         |
| 6   | $\alpha$ -Terpineol      | C98555        | C <sub>10</sub> H <sub>18</sub> O              | 154.3           | 1192.7          | 632.58                | 1.2204                   |         |
| 7   | $\beta$ -Citronellol     | C106229       | C <sub>10</sub> H <sub>20</sub> O              | 156.3           | 1229.6          | 689.918               | 1.342                    |         |
| 8   | Linalool                 | C78706        | C <sub>10</sub> H <sub>18</sub> O              | 154.3           | 1101.4          | 490.694               | 1.2217                   |         |
| 9   | $\gamma$ -Terpinene      | C99854        | C <sub>10</sub> H <sub>16</sub>                | 136.2           | 1077.7          | 453.848               | 1.2194                   |         |
| 10  | $\beta$ -Ocimene         | C1387791<br>3 | C <sub>10</sub> H <sub>16</sub>                | 136.2           | 1051.7          | 414.628               | 1.2156                   | Monomer |
| 11  | $\beta$ -Ocimene         | C1387791<br>3 | C <sub>10</sub> H <sub>16</sub>                | 136.2           | 1051.3          | 413.995               | 1.7034                   | Dimer   |
| 12  | Limonene                 | C138863       | C <sub>10</sub> H <sub>16</sub>                | 136.2           | 1023.4          | 374.774               | 1.2979                   | Monomer |
| 13  | Limonene                 | C138863       | C <sub>10</sub> H <sub>16</sub>                | 136.2           | 1022.9          | 374.142               | 1.7148                   | Dimer   |
| 14  | Myrcene                  | C123353       | C <sub>10</sub> H <sub>16</sub>                | 136.2           | 991.3           | 335.554               | 1.7186                   |         |
| 15  | $\beta$ -Pinene          | C127913       | C <sub>10</sub> H <sub>16</sub>                | 136.2           | 975.0           | 318.474               | 1.2181                   | Monomer |
| 16  | $\beta$ -Pinene          | C127913       | C <sub>10</sub> H <sub>16</sub>                | 136.2           | 973.7           | 317.209               | 1.6375                   | Dimer   |
| 17  | Camphene                 | C79925        | C <sub>10</sub> H <sub>16</sub>                | 136.2           | 946.2           | 292.538               | 1.2131                   |         |
| 18  | $\alpha$ -Pinene         | C80568        | C <sub>10</sub> H <sub>16</sub>                | 136.2           | 927.2           | 277.988               | 1.6667                   |         |
| 19  | Octanal                  | C124130       | C <sub>8</sub> H <sub>16</sub> O               | 128.2           | 1006.6          | 353.266               | 1.4069                   | Monomer |
| 20  | Octanal                  | C124130       | C <sub>8</sub> H <sub>16</sub> O               | 128.2           | 1007.1          | 353.899               | 1.8263                   | Dimer   |
| 21  | 2-Ethyl-6-methylpyrazine | C1392503<br>6 | C <sub>7</sub> H <sub>10</sub> N <sub>2</sub>  | 122.2           | 999.7           | 345.043               | 1.1776                   |         |
| 22  | Benzaldehyde             | C100527       | C <sub>7</sub> H <sub>6</sub> O                | 106.1           | 960.9           | 305.189               | 1.1522                   | Monomer |
| 23  | Benzaldehyde             | C100527       | C <sub>7</sub> H <sub>6</sub> O                | 106.1           | 963.0           | 307.087               | 1.4728                   | Dimer   |
| 24  | 2-Acetylfuran            | C1192627      | C <sub>6</sub> H <sub>6</sub> O <sub>2</sub>   | 110.1           | 916.1           | 270.092               | 1.117                    |         |
| 25  | Heptanal                 | C111717       | C <sub>7</sub> H <sub>14</sub> O               | 114.2           | 903.7           | 261.892               | 1.3342                   | Monomer |
| 26  | Heptanal                 | C111717       | C <sub>7</sub> H <sub>14</sub> O               | 114.2           | 902.9           | 261.306               | 1.6987                   | Dimer   |
| 27  | Cyclohexanone            | C108941       | C <sub>6</sub> H <sub>10</sub> O               | 98.1            | 899.6           | 259.256               | 1.1485                   | Monomer |

|    |               |         |                                              |       |       |         |        |         |
|----|---------------|---------|----------------------------------------------|-------|-------|---------|--------|---------|
| 28 | Cyclohexanone | C108941 | C <sub>6</sub> H <sub>10</sub> O             | 98.1  | 896.8 | 257.499 | 1.4557 | Dimer   |
| 29 | 1-Hexanol     | C111273 | C <sub>6</sub> H <sub>14</sub> O             | 102.2 | 875.1 | 244.613 | 1.3274 |         |
| 30 | (E)-2-Hexenol | C928950 | C <sub>6</sub> H <sub>12</sub> O             | 100.2 | 852.2 | 232.02  | 1.1834 | Monomer |
| 31 | (E)-2-Hexenol | C928950 | C <sub>6</sub> H <sub>12</sub> O             | 100.2 | 853.9 | 232.898 | 1.5153 | Dimer   |
| 32 | Furfurol      | C98011  | C <sub>5</sub> H <sub>4</sub> O <sub>2</sub> | 96.1  | 831.0 | 221.184 | 1.0855 | Monomer |
| 33 | Furfurol      | C98011  | C <sub>5</sub> H <sub>4</sub> O <sub>2</sub> | 96.1  | 830.4 | 220.891 | 1.3342 | Dimer   |
| 34 | Hexanal       | C66251  | C <sub>6</sub> H <sub>12</sub> O             | 100.2 | 795.6 | 204.49  | 1.2599 | Monomer |
| 35 | Hexanal       | C66251  | C <sub>6</sub> H <sub>12</sub> O             | 100.2 | 794.4 | 203.905 | 1.5626 | Dimer   |
| 36 | 2-Hexanone    | C591786 | C <sub>6</sub> H <sub>12</sub> O             | 100.2 | 784.1 | 199.33  | 1.1898 | Monomer |
| 37 | 2-Hexanone    | C591786 | C <sub>6</sub> H <sub>12</sub> O             | 100.2 | 783.4 | 199.017 | 1.5053 | Dimer   |
| 38 | 1-Pentanol    | C71410  | C <sub>5</sub> H <sub>12</sub> O             | 88.1  | 765.7 | 191.364 | 1.2533 |         |

**Table S1.** (continued).

| NO. | Compound           | CAS#     | Formula                                      | MW <sup>a</sup> | RI <sup>b</sup> | Rt <sup>c</sup> (sec) | Dt <sup>d</sup> [RIPrel] | Comment |
|-----|--------------------|----------|----------------------------------------------|-----------------|-----------------|-----------------------|--------------------------|---------|
| 39  | Dimethyl disulfide | C624920  | C <sub>2</sub> H <sub>6</sub> S <sub>2</sub> | 94.2            | 737.6           | 179.961               | 0.9877                   |         |
| 40  | Acetoin            | C513860  | C <sub>4</sub> H <sub>8</sub> O <sub>2</sub> | 88.1            | 717.6           | 172.62                | 1.0604                   | Monomer |
| 41  | Acetoin            | C513860  | C <sub>4</sub> H <sub>8</sub> O <sub>2</sub> | 88.1            | 713.9           | 171.371               | 1.3302                   | Dimer   |
| 42  | 2-Ethylfuran       | C3208160 | C <sub>6</sub> H <sub>8</sub> O              | 96.1            | 689.7           | 163.717               | 1.3116                   |         |
| 43  | Pentanal           | C110623  | C <sub>5</sub> H <sub>10</sub> O             | 86.1            | 700.0           | 166.841               | 1.4241                   |         |
| 44  | 2-Pentanone        | C107879  | C <sub>5</sub> H <sub>10</sub> O             | 86.1            | 698.1           | 166.216               | 1.3666                   |         |
| 45  | 2-Methylbutanal    | C96173   | C <sub>5</sub> H <sub>10</sub> O             | 86.1            | 668.1           | 157.938               | 1.4013                   |         |
| 46  | 3-Methylbutanal    | C590863  | C <sub>5</sub> H <sub>10</sub> O             | 86.1            | 651.7           | 154.033               | 1.1991                   | Monomer |
| 47  | 3-Methylbutanal    | C590863  | C <sub>5</sub> H <sub>10</sub> O             | 86.1            | 653.1           | 154.345               | 1.4063                   | Dimer   |
| 48  | Ethyl acetate      | C141786  | C <sub>4</sub> H <sub>8</sub> O <sub>2</sub> | 88.1            | 609.7           | 145.286               | 1.0977                   | Monomer |
| 49  | Ethyl acetate      | C141786  | C <sub>4</sub> H <sub>8</sub> O <sub>2</sub> | 88.1            | 610.4           | 145.442               | 1.337                    | Dimer   |
| 50  | Acetic acid        | C64197   | C <sub>2</sub> H <sub>4</sub> O <sub>2</sub> | 60.1            | 630.0           | 149.347               | 1.0494                   |         |
| 51  | Butanal            | C123728  | C <sub>4</sub> H <sub>8</sub> O              | 72.1            | 603.2           | 144.036               | 1.2905                   |         |
| 52  | 2-Butanone         | C78933   | C <sub>4</sub> H <sub>8</sub> O              | 72.1            | 590.2           | 141.537               | 1.2465                   |         |
| 53  | 2,3-Butanedione    | C431038  | C <sub>4</sub> H <sub>6</sub> O <sub>2</sub> | 86.1            | 562.4           | 136.227               | 1.167                    |         |
| 54  | Acetone            | C67641   | C <sub>3</sub> H <sub>6</sub> O              | 58.1            | 484.8           | 121.388               | 1.1154                   |         |
| 55  | Ethanol            | C64175   | C <sub>2</sub> H <sub>6</sub> O              | 46.1            | 452.2           | 115.14                | 1.0469                   |         |
| 56  | 2-Furfurylthiol    | C98022   | C <sub>5</sub> H <sub>6</sub> OS             | 114.2           | 908.8           | 265.25                | 1.1008                   |         |

---

|    |                    |         |                                                |       |        |          |        |
|----|--------------------|---------|------------------------------------------------|-------|--------|----------|--------|
|    | Methyl             |         |                                                |       |        |          |        |
| 57 | N-Methyl-anthranil | C85916  | C <sub>9</sub> H <sub>11</sub> NO <sub>2</sub> | 165.2 | 1510.4 | 1126.314 | 1.2664 |
|    | ate                |         |                                                |       |        |          |        |
| 58 | Geraniol           | C106241 | C <sub>10</sub> H <sub>18</sub> O              | 154.3 | 1369.8 | 907.809  | 1.2201 |
| 59 | Methylpropanal     | C78842  | C <sub>4</sub> H <sub>8</sub> O                | 72.1  | 554.4  | 134.703  | 1.2832 |

---

<sup>a</sup>MW: molecular mass; <sup>b</sup>RI: retention index; <sup>c</sup>Rt: retention time; <sup>d</sup>Dt: drift time.

Table S2. Information on the quantitated compounds of citrus-tea by HS-SPME-GC-MS.

| N<br>o.               | Compound                                                                                             | Concentration (µg/g) |               |               |               |               |               |               |               |               |               |               |               |               |               |               |               |               |               |               |
|-----------------------|------------------------------------------------------------------------------------------------------|----------------------|---------------|---------------|---------------|---------------|---------------|---------------|---------------|---------------|---------------|---------------|---------------|---------------|---------------|---------------|---------------|---------------|---------------|---------------|
|                       |                                                                                                      | WZ<br>M              | SMQ           | XQG           | NFM           | GC            | XJ            | XN            | ZM            | CX            | HY            | DD            | PS            | LZ            | BT            | JP            | XC            | LF            | YF            | NHE           |
| <b>Phenolic_acids</b> |                                                                                                      |                      |               |               |               |               |               |               |               |               |               |               |               |               |               |               |               |               |               |               |
| 1                     | d-Alanine                                                                                            | -                    | -             | -             | -             | 1.04±<br>0.22 | 0.35±<br>0.01 | -             | -             | -             | -             | 6.53±<br>0.27 | -             | -             | 4.41±<br>0.46 | -             | -             | -             | -             | -             |
| 2                     | Acetic acid                                                                                          | 0.47±<br>0.03        | 0.64±<br>0.09 | 0.46±<br>0.01 | 0.76±<br>0.06 | 3.38±<br>0.32 | 0.38±<br>0.04 | 0.75±<br>0.06 | 0.64±<br>0.03 | 0.33±<br>0.02 | 0.47±<br>0.07 | 1.97±<br>0.04 | 1.08±<br>0.32 | 0.36±<br>0.02 | 0.74±<br>0.06 | 0.12±<br>0.01 | 1.13±<br>0.16 | 0.74±<br>0.05 | 1.24±<br>0.64 | 1.64±0<br>.13 |
| 3                     | dl-Alanine                                                                                           | -                    | -             | -             | -             | 0.50±<br>0.03 | 1.36±<br>0.27 | -             | -             | -             | -             | -             | -             | -             | -             | -             | -             | -             | -             | -             |
| 4                     | (2,5-dioxo-1-pyridin-3-ylmethyl-4-trifluoromethylimidazolidin-4-yl)amide-Cyclopropanecarboxylic acid | -                    | -             | -             | 4.76±<br>0.64 | -             | -             | -             | -             | -             | -             | -             | -             | -             | -             | -             | -             | -             | -             | -             |
| 5                     | Tridecanoic acid                                                                                     | -                    | 2.73±<br>0.29 | -             | -             | -             | -             | -             | -             | -             | -             | -             | -             | -             | -             | -             | -             | -             | -             | -             |
| 6                     | n-Decanoic acid                                                                                      | -                    | -             | -             | -             | -             | -             | -             | 1.03±<br>0.36 | -             | -             | -             | -             | -             | -             | -             | -             | -             | -             | -             |
| 7                     | n-Hexadecanoic acid                                                                                  | -                    | -             | -             | -             | -             | -             | -             | 0.90±<br>0.02 | -             | -             | -             | -             | -             | -             | -             | -             | -             | -             | -             |
| 8                     | 3-(2-Isopropyl-5-methylphenyl)-2-methylpropionic acid                                                | 0.48±<br>0.03        | 1.63±<br>0.21 | 0.72±<br>0.04 | -             | -             | -             | -             | -             | -             | -             | -             | -             | -             | -             | -             | -             | -             | -             | -             |
| 9                     | 4-hydroxy-1H-Indole-3-carboxylic acid                                                                | -                    | -             | -             | -             | -             | -             | -             | -             | -             | 2.31±<br>0.31 | -             | -             | -             | -             | -             | -             | -             | -             | -             |
| 10                    | (1R,2S)-2-Acetyl-1-methylcyclobutaneacetic acid                                                      | -                    | -             | -             | -             | -             | -             | -             | -             | -             | -             | -             | -             | -             | -             | 4.93±<br>0.68 | -             | -             | -             | -             |

|    |                                                  |       |       |       |       |       |       |       |       |       |       |       |       |       |       |       |       |       |       |        |
|----|--------------------------------------------------|-------|-------|-------|-------|-------|-------|-------|-------|-------|-------|-------|-------|-------|-------|-------|-------|-------|-------|--------|
| 11 | 3-amino-2-methyl-Butanoic acid                   | -     | -     | -     | -     | -     | -     | -     | -     | -     | -     | -     | -     | -     | 0.69± | -     | -     | -     | -     | -      |
|    |                                                  |       |       |       |       |       |       |       |       |       |       |       |       |       | 0.04  |       |       |       |       |        |
| 12 | (.+/-)- $\alpha$ ,4-dihydroxy-Benzeneacetic acid | -     | -     | -     | -     | -     | -     | -     | -     | -     | -     | -     | -     | 0.56± | -     | -     | -     | -     | -     | -      |
|    |                                                  |       |       |       |       |       |       |       |       |       |       |       |       | 0.06  |       |       |       |       |       |        |
| 13 | 3-amino-2-methyl-Acetic acid                     | -     | -     | -     | -     | -     | -     | -     | -     | -     | -     | -     | -     | -     | -     | -     | -     | 0.37± | -     | -      |
|    |                                                  |       |       |       |       |       |       |       |       |       |       |       |       |       |       |       |       | 0.07  |       |        |
| 14 | i-Propyl tricosanoate                            | 3.01± | 5.51± | 6.32± | 2.86± | 0.36± | 1.42± | -     | -     | 2.24± | -     | -     | -     | -     | -     | -     | -     | -     | -     | -      |
|    |                                                  | 0.32  | 0.74  | 1.03  | 0.42  | 0.07  | 0.09  |       |       | 0.37  |       |       |       |       |       |       |       |       |       |        |
| 15 | Neodihydrocarveol                                | -     | -     | -     | -     | -     | -     | -     | -     | -     | -     | -     | -     | -     | -     | -     | -     | 1.68± | 2.14± | -      |
|    |                                                  |       |       |       |       |       |       |       |       |       |       |       |       |       |       |       |       | 0.27  | 0.41  |        |
| 16 | Thymol                                           | -     | 12.95 | 1.79± | -     | -     | -     | 3.57± | -     | -     | 1.84± | -     | 4.49± | 1.99± | -     | -     | -     | -     | -     | -      |
|    |                                                  |       | ±1.29 | 0.54  |       |       |       | 0.39  |       |       | 0.24  |       | 0.75  | 0.37  |       |       |       |       |       |        |
| 17 | Carvacrol                                        | 16.21 | 8.43± | 27.73 | 162.7 | 42.67 | 5.24± | 21.96 | 11.07 | 6.99± | 6.56± | 18.86 | 4.39± | 2.97± | 23.10 | 62.24 | 6.87± | 3.05± | 24.44 | 25.59± |
|    |                                                  | ±1.32 | 0.98  | ±3.26 | 9±6.2 | ±3.29 | 0.98  | ±3.14 | ±0.67 | 1.27  | 0.71  | ±1.67 | 0.35  | 0.42  | ±2.09 | ±4.19 | 1.28  | 0.74  | ±3.29 | 2.48   |
|    | Esters                                           |       |       |       |       |       |       |       |       |       |       |       |       |       |       |       |       |       |       |        |
| 18 | i-Propyl tricosanoate                            | 3.01± | 5.51± | 6.32± | 2.86± | 0.36± | 1.42± | -     | -     | 2.24± | -     | -     | -     | -     | -     | -     | -     | -     | -     | -      |
|    |                                                  | 0.65  | 0.42  | 0.68  | 0.37  | 0.02  | 0.13  |       |       | 0.14  |       |       |       |       |       |       |       |       |       |        |
| 19 | Linalyl acetate                                  | 48.52 | 34.71 | -     | -     | -     | -     | 36.95 | -     | -     | -     | 239.6 | -     | 26.23 | -     | -     | 41.16 | -     | 44.91 | -      |
|    |                                                  | ±4.38 | ±2.29 |       |       |       |       | ±2.28 |       |       |       | 4±9.6 |       | ±3.28 |       |       | ±1.68 |       | ±2.18 |        |
|    |                                                  |       |       |       |       |       |       |       |       |       |       | 8     |       |       |       |       |       |       |       |        |
| 20 | Methyl geraniate                                 | 0.59± | -     | -     | 0.61± | -     | -     | 0.45± | 0.43± | 0.55± | 0.26± | -     | 0.47± | 0.63± | -     | -     | 0.87± | 0.65± | 0.80± | 1.03±0 |
|    |                                                  | 0.06  |       |       | 0.08  |       |       | 0.03  | 0.07  | 0.05  | 0.07  |       | 0.09  | 0.02  |       |       | 0.12  | 0.06  | 0.04  | .13    |

Table S2. (continued).

| N<br>o. | Compound                                          | Concentration ( $\mu\text{g/g}$ ) |                |                |                |                |                |                |                |                |                |                |                |                |                |                |                |                |                |                |
|---------|---------------------------------------------------|-----------------------------------|----------------|----------------|----------------|----------------|----------------|----------------|----------------|----------------|----------------|----------------|----------------|----------------|----------------|----------------|----------------|----------------|----------------|----------------|
|         |                                                   | WZ<br>M                           | SMQ            | XQG            | NFM            | GC             | XJ             | XN             | ZM             | CX             | HY             | DD             | PS             | LZ             | BT             | JP             | XC             | LF             | YF             | NHE            |
| 21      | Pentafluoropropionic acid, octyl ester            | -                                 | -              | -              | -              | -              | -              | -              | -              | -              | -              | -              | 3.92±<br>1.03  | -              | -              | -              | -              | -              | -              | -              |
| 22      | Methyl benzoate                                   | -                                 | -              | -              | -              | -              | 22.21<br>±1.36 | -              | -              | -              | -              | -              | -              | 28.78<br>±2.91 | -              | -              | -              | -              | -              | -              |
| 23      | Ethyl caprate                                     | -                                 | -              | -              | -              | -              | -              | -              | 1.01±<br>0.02  | -              | -              | -              | -              | -              | -              | -              | -              | -              | -              | -              |
| 24      | <i>trans</i> -Carveyl acetate                     | -                                 | 1.17±<br>0.15  | -              | -              | -              | -              | -              | -              | -              | -              | -              | -              | -              | -              | -              | -              | -              | -              | -              |
| 25      | Bicyclogermacrene                                 | -                                 | -              | -              | -              | -              | 0.91±<br>0.04  | -              | 1.48±<br>0.38  | -              | -              | -              | -              | -              | -              | 14.62<br>±1.38 | -              | -              | -              | -              |
| 26      | Octyl acetate                                     | 6.45±<br>0.29                     | 2.96±<br>0.24  | -              | 4.70±<br>0.68  | -              | -              | 3.83±          | 3.09±          | 4.37±<br>0.38  | 3.11±<br>0.35  | 14.47<br>±1.24 | 3.16±<br>0.67  | -              | -              | -              | 4.63±<br>1.03  | 2.53±<br>0.31  | 4.48±<br>0.38  | -              |
| 27      | 1,6-Octadien-3-ol, 3,7-dimethyl-, 2-aminobenzoate | -                                 | -              | 47.43<br>±3.24 | 47.81<br>±3.68 | 16.35<br>±1.26 | 36.84<br>±2.57 | -              | 27.53<br>±2.19 | 30.94<br>±2.46 | 45.18<br>±3.67 | -              | 35.92<br>±4.26 | -              | 99.17<br>±6.38 | 56.23<br>±4.37 | -              | 19.71<br>±2.61 | 14.65<br>±1.38 | 51.06<br>±2.17 |
| 28      | Perillyl acetate                                  | -                                 | -              | -              | -              | -              | -              | -              | -              | -              | -              | -              | -              | -              | -              | -              | 1.73±<br>0.28  | -              | -              | -              |
| 29      | Geranyl acetate (Z)                               | 16.33<br>±2.19                    | 12.70<br>±1.06 | 15.37<br>±1.09 | 21.29<br>±1.09 | 54.22<br>±9.68 | 47.61<br>±3.67 | 13.73<br>±2.19 | 8.12±<br>1.29  | 21.66<br>±2.18 | 13.12<br>±0.29 | 70.30<br>±6.26 | 10.70<br>±1.31 | 14.82<br>±0.76 | 37.13<br>±2.19 | 12.55<br>±1.65 | 19.30<br>±1.29 | 17.22<br>±2.91 | 20.40<br>±1.69 | 29.52<br>±3.67 |
| 30      | Geranyl acetate (E)                               | 17.48<br>±2.31                    | 15.16<br>±2.61 | 19.09<br>±1.26 | 23.09<br>±2.19 | 61.93<br>±2.94 | 7.16±<br>0.75  | 14.61<br>±2.19 | 8.32±<br>0.98  | 15.01<br>±1.06 | 13.06<br>±1.06 | 93.77<br>±4.28 | 10.72<br>±1.03 | 14.10<br>±1.36 | 40.98<br>±2.97 | 14.68<br>±0.98 | 15.60<br>±1.09 | 10.04<br>±0.38 | 19.46<br>±1.59 | 29.20<br>±2.04 |
| 31      | Decyl acetate                                     | -                                 | 4.90±<br>0.12  | -              | -              | 4.76±<br>0.39  | 2.39±<br>0.17  | -              | -              | -              | -              | -              | -              | -              | -              | 0.30±<br>0.02  | -              | -              | -              | -              |
| 32      | 1-Decanol acetate                                 | -                                 | -              | -              | -              | -              | -              | -              | 0.71±<br>0.03  | 1.65±<br>0.21  | 0.92±<br>0.03  | 10.03<br>±0.98 | 1.05±<br>0.24  | -              | -              | -              | -              | -              | -              | -              |

|    |                                                                      |   |               |               |   |                |                |               |               |               |               |   |   |               |   |               |                |               |               |               |
|----|----------------------------------------------------------------------|---|---------------|---------------|---|----------------|----------------|---------------|---------------|---------------|---------------|---|---|---------------|---|---------------|----------------|---------------|---------------|---------------|
| 33 | 3-Hydroxymandelic acid, ethyl ester, di-TMS                          | - | 1.79±<br>0.25 | -             | - | -              | -              | -             | -             | -             | -             | - | - | 0.18±<br>0.02 | - | -             | -              | 2.12±<br>0.12 | 3.93±<br>0.63 | -             |
| 34 | linalool formate                                                     | - | -             | -             | - | 67.45<br>±3.25 | 45.36<br>±2.26 | -             | -             | -             | -             | - | - | -             | - | -             | -              | -             | -             | -             |
| 35 | Isopropoxycarbamic acid, ethyl ester                                 | - | -             | 2.09±<br>0.67 | - | -              | -              | -             | -             | -             | -             | - | - | -             | - | -             | -              | 1.98±<br>0.19 | 3.53±<br>0.25 | -             |
| 36 | Myrtenyl acetate                                                     | - | -             | -             | - | -              | -              | -             | -             | -             | -             | - | - | -             | - | 3.45±<br>0.36 | -              | -             | -             | -             |
| 37 | Octyl trichloroacetate                                               | - | -             | -             | - | -              | -              | -             | -             | -             | -             | - | - | -             | - | -             | -              | -             | -             | 2.61±<br>0.57 |
| 38 | Diethyl 4,4'-methylenedioxyphthalate                                 | - | -             | -             | - | -              | -              | 0.14±<br>0.02 | -             | -             | -             | - | - | -             | - | -             | 0.37±<br>0.02  | -             | -             | -             |
| 39 | Butanoic acid, 2,7-dimethyloct-7-en-5-yn-4-yl ester                  | - | -             | -             | - | -              | -              | -             | -             | 0.46±<br>0.03 | -             | - | - | -             | - | -             | -              | -             | -             | -             |
| 40 | Z-Methyl geranate                                                    | - | -             | -             | - | -              | -              | -             | -             | -             | -             | - | - | -             | - | -             | -              | 0.30±<br>0.03 | 0.42±<br>0.08 | -             |
| 41 | Methyl caprate                                                       | - | -             | -             | - | -              | -              | -             | 0.49±<br>0.07 | -             | -             | - | - | -             | - | -             | -              | -             | -             | -             |
| 42 | 1-Octyl trifluoroacetate                                             | - | -             | -             | - | -              | -              | -             | -             | -             | 3.64±<br>0.36 | - | - | -             | - | -             | -              | -             | -             | -             |
| 43 | Methyl 5-acetyl-2-methoxybenzoate                                    | - | -             | -             | - | -              | -              | -             | -             | -             | -             | - | - | -             | - | -             | 0.09±<br>0.000 | -             | -             | -             |
| 44 | [2-Methyl-4-(piperidine-1-sulfonyl)phenoxy]acetic acid, methyl ester | - | -             | -             | - | -              | -              | -             | -             | -             | -             | - | - | -             | - | -             | -              | 0.26±<br>0.01 | 0.72±<br>0.06 | -             |

Table S2. (continued).

| N<br>o. | Compound                                                 | Concentration ( $\mu\text{g/g}$ ) |                     |                     |                      |                     |                     |                      |                     |                     |                      |                |                     |                     |                     |                |                      |                      |                      |                      |
|---------|----------------------------------------------------------|-----------------------------------|---------------------|---------------------|----------------------|---------------------|---------------------|----------------------|---------------------|---------------------|----------------------|----------------|---------------------|---------------------|---------------------|----------------|----------------------|----------------------|----------------------|----------------------|
|         |                                                          | WZ<br>M                           | SMQ                 | XQG                 | NFM                  | GC                  | XJ                  | XN                   | ZM                  | CX                  | HY                   | DD             | PS                  | LZ                  | BT                  | JP             | XC                   | LF                   | YF                   | NHE                  |
| 45      | 5,6,7,7a-Tetrahydro-4,4,7a-trimethyl-2(4H)-benzofuranone | -                                 | -                   | -                   | -                    | -                   | -                   | -                    | -                   | -                   | -                    | -              | -                   | -                   | -                   | -              | -                    | 3.25±<br>0.84        | 1.82±<br>0.12        | -                    |
|         | Alcohols                                                 |                                   |                     |                     |                      |                     |                     |                      |                     |                     |                      |                |                     |                     |                     |                |                      |                      |                      |                      |
| 46      | <i>cis</i> -p-Mentha-2,8-dien-1-ol                       | 23.27<br>±1.21                    | -                   | -                   | -                    | 11.65<br>±0.68      | 8.31±<br>1.03       | -                    | -                   | 32.09<br>±3.28      | -                    | -              | -                   | -                   | 30.28<br>±2.16      | -              | -                    | 15.26<br>±1.18       | 21.35<br>±1.38       | 3.63±<br>0.15        |
| 47      | Terpinen-4-ol                                            | 21.45<br>±3.69                    | -                   | -                   | -                    | -                   | 19.16<br>±2.03      | 28.56<br>±1.03       | -                   | 16.22<br>±1.75      | 12.22<br>±0.98       | 31.61<br>±4.67 | 11.54<br>±2.37      | -                   | 47.70<br>±6.28      | 35.86<br>±4.59 | 17.72<br>±3.58       | -                    | -                    | 18.89<br>±1.38       |
| 48      | Carveol                                                  | 13.77<br>±0.27                    | -                   | 3.26±<br>0.75       | -                    | -                   | -                   | -                    | -                   | -                   | 7.59±<br>1.05        | -              | -                   | -                   | 53.50<br>±4.68      | -              | -                    | -                    | -                    | -                    |
| 49      | <i>trans</i> - $\beta$ -Santalol                         | -                                 | -                   | -                   | -                    | -                   | -                   | -                    | -                   | -                   | -                    | -              | -                   | -                   | -                   | -              | -                    | -                    | -                    | -                    |
| 50      | 1-Octanol                                                | -                                 | 4.43±<br>0.36       | 19.71<br>±2.06      | 10.85<br>±1.36       | -                   | 6.55±<br>0.46       | 8.15±<br>0.74        | 4.67±<br>0.18       | -                   | -                    | -              | -                   | -                   | -                   | -              | -                    | 4.78±<br>0.35        | 7.12±<br>1.06        | -                    |
| 51      | (R)-Lavandulol                                           | -                                 | -                   | -                   | -                    | -                   | -                   | -                    | -                   | -                   | -                    | -              | -                   | -                   | -                   | -              | -                    | -                    | -                    | -                    |
| 52      | <i>cis</i> - $\beta$ -Terpineol                          | -                                 | -                   | -                   | -                    | -                   | -                   | -                    | -                   | -                   | -                    | -              | -                   | -                   | -                   | -              | -                    | -                    | -                    | -                    |
| 53      | Linalool                                                 | 144.8<br>4±6.9<br>8               | 462.6<br>8±9.6<br>8 | 148.4<br>8±7.1<br>5 | 269.6<br>5±14.<br>02 | 184.0<br>6±5.1<br>9 | 187.1<br>0±7.6<br>4 | 171.7<br>2±12.<br>35 | 118.3<br>6±6.5<br>4 | 131.6<br>1±8.4<br>6 | 291.7<br>2±11.<br>21 | 93.86<br>±3.64 | 107.4<br>8±8.4<br>9 | 108.2<br>4±9.5<br>4 | 174.1<br>5±9.3<br>7 | 91.31<br>±5.37 | 217.3<br>7±17.<br>62 | 386.2<br>7±11.<br>03 | 289.4<br>5±12.<br>13 | 147.9<br>2±12.<br>32 |
| 54      | <i>trans</i> -p-Mentha-2,8-dienol                        | -                                 | 7.61±<br>0.38       | 49.42<br>±2.74      | -                    | 14.69<br>±2.19      | 23.76<br>±1.32      | -                    | 14.34<br>±1.28      | -                   | -                    | 24.21<br>±2.37 | -                   | -                   | 41.39<br>±3.18      | 28.36<br>±2.19 | -                    | -                    | -                    | -                    |
| 55      | <i>cis</i> -p-Menth-2,8-diene-1-ol                       | 37.68<br>±3.67                    | 4.63±<br>0.35       | 43.32<br>±3.24      | 41.36<br>±6.38       | 10.50<br>±1.23      | 15.86<br>±1.65      | 41.78<br>±3.28       | 8.95±<br>1.34       | 17.78<br>±2.19      | 53.05<br>±4.26       | 32.00<br>±4.25 | 29.78<br>±3.33      | 41.72<br>±4.11      | 18.52<br>±2.19      | 54.66<br>±3.27 | 63.43<br>±5.26       | 20.01<br>±2.18       | 26.81<br>±2.98       | 62.00<br>±3.28       |
| 56      | 2,6-Dimethyl-1,5,7-octatrien-3-ol                        | -                                 | -                   | -                   | 8.04±<br>0.32        | -                   | 3.78±<br>0.12       | 7.56±<br>0.64        | 3.88±<br>0.12       | 4.68±<br>0.37       | 8.04±<br>0.74        | -              | 5.75±<br>0.23       | 8.60±<br>0.57       | 22.17<br>±1.32      | -              | 11.12<br>±0.65       | 5.49±<br>0.25        | 9.38±<br>1.06        | 10.79<br>±0.45       |



|    |                                                |       |       |         |       |         |         |        |       |       |       |        |       |       |         |       |       |       |        |         |
|----|------------------------------------------------|-------|-------|---------|-------|---------|---------|--------|-------|-------|-------|--------|-------|-------|---------|-------|-------|-------|--------|---------|
| 57 | Nerolidolcistrans                              | -     | -     | -       | -     | -       | -       | -      | -     | -     | -     | -      | 0.57± | 2.45± | -       | -     | -     | -     | -      |         |
|    |                                                |       |       |         |       |         |         |        |       |       |       |        | 0.02  | 0.25  | -       | -     | -     | -     | -      |         |
| 58 | (-)-4-Terpineol                                | -     | 25.72 | 140.0   | 40.89 | -       | -       | -      | 20.51 | -     | -     | -      | -     | 26.71 | -       | -     | 18.37 | 32.18 | -      |         |
|    |                                                |       | ±2.64 | 4±21.06 | ±2.98 |         |         |        | ±2.75 |       |       |        |       | ±3.29 |         |       | ±1.32 | ±2.65 |        |         |
| 59 | Isocarveol                                     | 65.61 | -     | 97.86   | -     | 227.3   | 156.2   | 94.40  | -     | -     | 90.49 | 116.8  | 67.66 | 61.51 | 204.2   | 46.19 | 68.69 | 79.09 | 111.9  | 221.8   |
|    |                                                | ±2.38 |       | ±5.64   |       | 6±32.61 | 8±23.24 | ±15.32 |       |       | ±6.57 | 2±2.19 | ±2.19 | ±4.68 | 5±13.26 | ±3.29 | ±6.36 | ±7.16 | 6±6.34 | 5±23.12 |
| 60 | p-Menth-1-en-8-ol                              | 13.83 | 39.78 | 85.64   | 55.20 | -       | 22.91   | 31.62  | 27.73 | 14.98 | 9.04± | 49.66  | 11.02 | 10.83 | 51.15   | 34.63 | 15.54 | -     | 22.66  | -       |
|    |                                                | ±1.32 | ±2.35 | ±6.24   | ±2.03 |         | ±2.16   | ±3.61  | ±2.31 | ±1.67 | 0.68  | ±2.34  | ±1.37 | ±0.68 | ±4.22   | ±3.19 | ±2.31 |       | ±1.32  |         |
| 61 | cis-β-Terpineol                                | -     | -     | 1.91±   | -     | -       | -       | -      | -     | -     | -     | -      | -     | 0.62± | -       | -     | -     | -     | -      | -       |
|    |                                                |       |       | 0.32    |       |         |         |        |       |       |       |        |       | 0.09  |         |       |       |       |        |         |
| 62 | Nerol                                          | -     | -     | -       | 27.82 | -       | -       | 25.81  | -     | 17.25 | -     | -      | 13.39 | -     | -       | -     | -     | 25.84 | 32.75  | -       |
|    |                                                |       |       |         | ±3.21 |         |         | ±1.32  |       | ±2.01 |       |        | ±1.03 |       |         |       |       | ±2.31 | ±2.15  |         |
| 63 | 2-Methyl-6-methylene-octa-1,7-dien-3-ol        | -     | 3.64± | -       | -     | -       | -       | -      | -     | -     | -     | -      | -     | -     | -       | -     | -     | -     | -      | -       |
|    |                                                |       | 0.35  |         |       |         |         |        |       |       |       |        |       |       |         |       |       |       |        |         |
| 64 | 3,6-dimethoxy-9-(2-phenylethynyl)-Fluoren-9-ol | -     | 1.67± | -       | -     | -       | -       | -      | -     | -     | -     | -      | -     | -     | -       | -     | -     | -     | -      | -       |
|    |                                                |       | 0.37  |         |       |         |         |        |       |       |       |        |       |       |         |       |       |       |        |         |
| 65 | (Z)-Carveol                                    | 39.77 | 18.24 | 93.75   | 37.26 | 129.6   | 58.01   | 36.91  | 15.52 | 20.09 | 26.52 | 78.74  | 24.52 | 42.79 | 133.6   | 30.31 | 44.48 | 11.43 | 47.13  | 59.00   |
|    |                                                | ±2.03 | ±1.32 | ±6.24   | ±2.13 | 6±5.12  | ±2.17   | ±3.25  | ±0.96 | ±2.16 | ±1.38 | ±6.28  | ±3.64 | ±2.19 | 9±6.27  | ±2.19 | ±3.65 | ±1.32 | ±3.61  | ±3.27   |



|    |                                          |               |               |                |               |       |   |               |                |               |                |               |               |   |   |               |               |               |               |
|----|------------------------------------------|---------------|---------------|----------------|---------------|-------|---|---------------|----------------|---------------|----------------|---------------|---------------|---|---|---------------|---------------|---------------|---------------|
| 77 | $\tau$ -Muurolol                         | -             | 0.98±<br>0.21 | -              | -             | -     | - | -             | -              | 0.38±<br>0.03 | -              | -             | -             | - | - | -             | -             | -             | -             |
| 78 | $\beta$ -Eudesmol                        | -             | -             | -              | -             | -     | - | -             | -              | 0.40±<br>0.01 | -              | -             | -             | - | - | 1.13±<br>0.02 | -             | -             | -             |
| 79 | 1-(1-methylene-2-propenyl)-Cyclopentanol | -             | -             | 1.38±<br>0.36  | -             | -     | - | -             | -              | -             | -              | -             | -             | - | - | -             | -             | -             | -             |
| 80 | Phytol                                   | -             | -             | -              | 0.29±<br>0.12 | -     | - | 0.33±<br>0.03 | 0.18±<br>0.02  | -             | -              | -             | -             | - | - | -             | -             | -             | 0.31±<br>0.01 |
| 81 | <i>trans</i> -Nerolidol                  | -             | -             | -              | -             | -     | - | -             | -              | 1.93±<br>0.32 | 31.61<br>±2.37 | -             | -             | - | - | -             | -             | -             | -             |
| 82 | (+)- $\beta$ -Citronellol                | -             | -             | 45.53<br>±2.37 | -             | -     | - | -             | 23.05<br>±2.36 | -             | -              | -             | -             | - | - | -             | -             | -             | -             |
| 83 | p-Mentha-1(7),8(10)-dien-9-ol            | -             | -             | -              | -             | -     | - | -             | -              | -             | -              | 2.33±<br>0.35 | 3.18±<br>0.27 | - | - | -             | 2.68±<br>0.16 | 3.84±<br>0.17 | 7.30±<br>0.45 |
| 84 | 2-Methyl-1,5-heptadien-4-ol              | 0.64±<br>0.03 | -             | -              | -             | -     | - | 0.71±<br>0.12 | -              | -             | -              | -             | -             | - | - | -             | 1.32±<br>0.31 | 1.14±<br>0.01 | -             |
| 85 | 2-(4-Methylphenyl)propan-2-ol            | -             | 8.82±<br>0.65 | -              | -             | -     | - | -             | -              | -             | -              | -             | -             | - | - | -             | -             | -             | -             |
| 86 | <i>L</i> - $\alpha$ -Terpineol netural   | -             | -             | -              | -             | 44.35 | - | -             | -              | -             | -              | -             | -             | - | - | -             | -             | -             | -             |
| 87 | Nerolidol 2                              | -             | -             | -              | -             | -     | - | -             | -              | -             | -              | 0.83          | 0.65          | - | - | -             | -             | -             | -             |

Table S2. (continued).

|    | Compound                                                    | Concentration ( $\mu\text{g/g}$ ) |                     |                     |     |                     |                     |                    |                    |                     |                     |    |    |                     |    |                    |    |                     |                     |
|----|-------------------------------------------------------------|-----------------------------------|---------------------|---------------------|-----|---------------------|---------------------|--------------------|--------------------|---------------------|---------------------|----|----|---------------------|----|--------------------|----|---------------------|---------------------|
|    |                                                             | WZ<br>M                           | SMQ                 | XQG                 | NFM | GC                  | XJ                  | XN                 | ZM                 | CX                  | HY                  | DD | PS | LZ                  | BT | JP                 | XC | LF                  | YF                  |
| 88 | 1-(methylenecyclopropyl)-Cyclopentanol                      | -                                 | 19.33<br>$\pm 2.36$ | -                   | -   | -                   | -                   | -                  | -                  | 24.82<br>$\pm 1.12$ | -                   | -  | -  | -                   | -  | -                  | -  | -                   | -                   |
| 89 | (2Z,6E)-Farnesol                                            | -                                 | -                   | -                   | -   | -                   | -                   | 3.84 $\pm$<br>0.32 | 1.40 $\pm$<br>0.12 | -                   | 2.34 $\pm$<br>0.21  | -  | -  | 1.58 $\pm$<br>0.31  | -  | -                  | -  | -                   | -                   |
| 90 | Coolact                                                     | -                                 | -                   | 4.82 $\pm$<br>0.334 | -   | 39.99<br>$\pm 3.65$ | 43.21<br>$\pm 3.29$ | -                  | -                  | -                   | -                   | -  | -  | -                   | -  | -                  | -  | -                   | -                   |
| 91 | 3-Methoxybenzyl alcohol                                     | -                                 | -                   | -                   | -   | 8.11 $\pm$<br>1.31  | 4.36 $\pm$<br>0.31  | -                  | -                  | -                   | -                   | -  | -  | -                   | -  | -                  | -  | -                   | -                   |
| 92 | 1-chloro-2-Propanol                                         | -                                 | -                   | 0.41 $\pm$<br>0.03  | -   | -                   | 0.26 $\pm$<br>0.01  | -                  | -                  | -                   | 0.20 $\pm$<br>0.009 | -  | -  | -                   | -  | 0.30 $\pm$<br>0.03 | -  | 0.03 $\pm$<br>0.000 | -                   |
| 93 | 2-(2-Hydroxyethoxy)ethanol<br>1-nitrate                     | -                                 | -                   | 0.07 $\pm$<br>0.000 | -   | -                   | -                   | -                  | -                  | -                   | -                   | -  | -  | -                   | -  | -                  | -  | 2.68 $\pm$<br>0.68  | 3.78 $\pm$<br>0.46  |
| 94 | L(-)-Menthol                                                | -                                 | -                   | 6.75 $\pm$<br>0.67  | -   | -                   | -                   | -                  | -                  | -                   | -                   | -  | -  | -                   | -  | -                  | -  | -                   | -                   |
| 95 | p-Menth-1-en-9-ol(8Cl)                                      | -                                 | -                   | 11.62<br>$\pm 2.36$ | -   | -                   | -                   | -                  | -                  | -                   | -                   | -  | -  | -                   | -  | -                  | -  | -                   | -                   |
| 96 | 4-Methoxyphenyl methyl carbinol                             | -                                 | -                   | -                   | -   | -                   | -                   | -                  | -                  | -                   | -                   | -  | -  | 10.93<br>$\pm 1.32$ | -  | -                  | -  | -                   | -                   |
| 97 | <i>trans</i> -3-methylpent-3-ene-5-ol                       | -                                 | -                   | -                   | -   | 2.36 $\pm$<br>0.21  | 6.09 $\pm$<br>1.03  | -                  | -                  | -                   | -                   | -  | -  | -                   | -  | -                  | -  | -                   | -                   |
| 98 | 1,3-Methano-5bH-cyclobuta[cd]p<br>entalen-5b-ol, octahydro- | -                                 | -                   | -                   | -   | 4.67 $\pm$<br>0.45  | 9.02 $\pm$<br>0.97  | -                  | -                  | -                   | -                   | -  | -  | -                   | -  | -                  | -  | -                   | 17.19<br>$\pm 2.61$ |



Table S2. (continued).

| N<br>o. | Compound                                                 | Concentration ( $\mu\text{g/g}$ ) |                    |     |                     |    |                    |    |                    |                    |    |    |                    |                    |    |    |    |                    |                    |     |
|---------|----------------------------------------------------------|-----------------------------------|--------------------|-----|---------------------|----|--------------------|----|--------------------|--------------------|----|----|--------------------|--------------------|----|----|----|--------------------|--------------------|-----|
|         |                                                          | WZ<br>M                           | SMQ                | XQG | NFM                 | GC | XJ                 | XN | ZM                 | CX                 | HY | DD | PS                 | LZ                 | BT | JP | XC | LF                 | YF                 | NHE |
| 11<br>2 | $\alpha,2,6,6$ -Tetramethyl-1-cyclohexen<br>e-1-methanol | -                                 | -                  | -   | -                   | -  | -                  | -  | -                  | -                  | -  | -  | -                  | -                  | -  | -  | -  | 1.97 $\pm$<br>0.03 | 2.08 $\pm$<br>0.17 | -   |
| 11<br>3 | (+/-)-1-amino-2-Propanol                                 | -                                 | -                  | -   | -                   | -  | -                  | -  | -                  | -                  | -  | -  | 0.34 $\pm$<br>0.01 | -                  | -  | -  | -  | -                  | -                  | -   |
| 11<br>4 | <i>cis</i> -Linaloloxide                                 | -                                 | -                  | -   | -                   | -  | -                  | -  | -                  | -                  | -  | -  | 2.52 $\pm$<br>0.24 | -                  | -  | -  | -  | -                  | -                  | -   |
|         | Aldehydes                                                |                                   |                    |     |                     |    |                    |    |                    |                    |    |    |                    |                    |    |    |    |                    |                    |     |
| 11<br>5 | Dodecanal                                                | -                                 | -                  | -   | -                   | -  | -                  | -  | -                  | -                  | -  | -  | -                  | 0.70 $\pm$<br>0.06 | -  | -  | -  | 0.60 $\pm$<br>0.03 | -                  | -   |
| 11<br>6 | Benzeneacetaldehyde                                      | -                                 | -                  | -   | -                   | -  | 4.07 $\pm$<br>0.21 | -  | -                  | -                  | -  | -  | -                  | -                  | -  | -  | -  | -                  | -                  | -   |
| 11<br>7 | 1,3-Dioxan-5-ol                                          | 0.06 $\pm$<br>0.000<br>1          | -                  | -   | -                   | -  | -                  | -  | -                  | -                  | -  | -  | -                  | -                  | -  | -  | -  | -                  | -                  | -   |
| 11<br>8 | (E)-3,7-dimethyl-2,6-Octadienal                          | -                                 | -                  | -   | -                   | -  | -                  | -  | 2.40 $\pm$<br>0.29 | -                  | -  | -  | 2.70 $\pm$<br>0.14 | -                  | -  | -  | -  | 6.36 $\pm$<br>0.68 | 7.42 $\pm$<br>0.74 | -   |
| 11<br>9 | Nonanal                                                  | -                                 | -                  | -   | 10.16<br>$\pm$ 1.02 | -  | -                  | -  | -                  | -                  | -  | -  | -                  | -                  | -  | -  | -  | -                  | -                  | -   |
| 12<br>0 | Octadecanal                                              | -                                 | -                  | -   | -                   | -  | -                  | -  | -                  | 0.74 $\pm$<br>0.06 | -  | -  | -                  | -                  | -  | -  | -  | -                  | -                  | -   |
| 12<br>1 | Citronellal                                              | -                                 | 0.95 $\pm$<br>0.04 | -   | -                   | -  | -                  | -  | 2.25 $\pm$<br>0.37 | -                  | -  | -  | -                  | -                  | -  | -  | -  | -                  | -                  | -   |
| 12<br>2 | Citral                                                   | -                                 | -                  | -   | -                   | -  | -                  | -  | -                  | -                  | -  | -  | -                  | 2.09 $\pm$<br>0.31 | -  | -  | -  | -                  | -                  | -   |



Table S2. (continued).

| N<br>o. | Compound                                               | Concentration ( $\mu\text{g/g}$ ) |                |                     |                |               |    |    |               |               |    |               |    |                |    |    |               |               |               |     |
|---------|--------------------------------------------------------|-----------------------------------|----------------|---------------------|----------------|---------------|----|----|---------------|---------------|----|---------------|----|----------------|----|----|---------------|---------------|---------------|-----|
|         |                                                        | WZ<br>M                           | SMQ            | XQG                 | NFM            | GC            | XJ | XN | ZM            | CX            | HY | DD            | PS | LZ             | BT | JP | XC            | LF            | YF            | NHE |
| 13<br>4 | Tridecanal                                             | -                                 | -              | 1.89±<br>0.24       | -              | 9.88±<br>0.24 | -  | -  | -             | -             | -  | -             | -  | -              | -  | -  | -             | -             | -             | -   |
| 13<br>5 | 2-methyl-3-methylene-Cyclopentanecarboxaldehyde        | -                                 | 16.97<br>±2.31 | -                   | -              | -             | -  | -  | -             | -             | -  | -             | -  | -              | -  | -  | -             | -             | -             | -   |
| 13<br>6 | 4-Cyclohexylidenebutyraldehyde                         | -                                 | -              | 124.6<br>2±4.2<br>1 | -              | -             | -  | -  | -             | -             | -  | -             | -  | -              | -  | -  | -             | -             | -             | -   |
| 13<br>7 | Benzaldehyde                                           | -                                 | -              | -                   | -              | -             | -  | -  | -             | -             | -  | 0.39±<br>0.02 | -  | -              | -  | -  | -             | -             | -             | -   |
| 13<br>8 | (+)-Citronellal                                        | -                                 | -              | -                   | 2.73±<br>0.27  | -             | -  | -  | -             | -             | -  | -             | -  | -              | -  | -  | -             | -             | -             | -   |
| 13<br>9 | dimethoxy-Methane                                      | -                                 | -              | -                   | -              | -             | -  | -  | -             | -             | -  | -             | -  | -              | -  | -  | -             | 0.97±<br>0.04 | 1.25±<br>0.27 | -   |
| 14<br>0 | 3,5-Dimethylcyclohex-1-ene-4-carboxaldehyde<br>Ketones | -                                 | -              | -                   | -              | -             | -  | -  | -             | -             | -  | -             | -  | -              | -  | -  | -             | 0.57±<br>0.02 | 0.73±<br>0.03 | -   |
| 14<br>1 | (+)-Dihydrocarvone                                     | 5.92±<br>1.03                     | -              | 7.44±<br>0.68       | -              | -             | -  | -  | -             | 2.35±<br>0.28 | -  | -             | -  | -              | -  | -  | 5.50±<br>0.45 | -             | -             | -   |
| 14<br>2 | Hydroxyacetone                                         | -                                 | -              | -                   | -              | -             | -  | -  | 0.28±<br>0.02 | -             | -  | -             | -  | -              | -  | -  | -             | -             | -             | -   |
| 14<br>3 | 2-(1-methylpropyl)-Cyclopentanone                      | -                                 | -              | -                   | 18.76<br>±2.61 | -             | -  | -  | -             | 9.62±<br>1.24 | -  | -             | -  | 20.03<br>±3.17 | -  | -  | -             | -             | -             | -   |



|    |                                   |       |       |       |       |       |       |       |       |       |       |       |       |       |       |       |       |       |       |       |
|----|-----------------------------------|-------|-------|-------|-------|-------|-------|-------|-------|-------|-------|-------|-------|-------|-------|-------|-------|-------|-------|-------|
| 14 | 2-Hydroxy-5-methyl                | 1.31± |       |       | 0.44± |       |       |       |       |       |       |       |       |       |       |       |       |       |       |       |
| 4  | acetophenone                      | 0.21  | -     | -     | 0.01  | -     | -     | -     | -     | -     | -     | -     | -     | -     | -     | -     | -     | -     | -     |       |
| 14 | 4-Isopropenylcyclohexanone        | -     | -     | -     | -     | -     | -     | -     | 2.79± | -     | -     | -     | 3.75± | -     | -     | -     | -     | -     | -     |       |
| 5  |                                   |       |       |       |       |       |       |       | 0.23  |       |       |       | 0.27  |       |       |       |       |       |       |       |
| 14 | Hydroxyacetone                    | -     | -     | -     | -     | -     | -     | -     | -     | -     | -     | -     | -     | -     | -     | -     | 12.37 | -     | -     |       |
| 6  |                                   |       |       |       |       |       |       |       |       |       |       |       |       |       |       |       | ±2.17 |       |       |       |
| 14 | [1,1'-Bicyclopentyl]-2-one        | -     | -     | -     | 0.75± | 0.57± | 0.54± | -     | -     | -     | -     | -     | 0.45± | 0.78± | -     | -     | -     | -     | 1.28± |       |
| 7  |                                   |       |       |       | 0.27  | 0.07  | 0.04  |       |       |       |       |       | 0.06  | 0.18  |       |       |       |       | 0.24  |       |
| 14 | <i>trans</i> -Dihydrocarvone      | -     | 2.90± | -     | 28.28 | 18.15 | 3.55± | -     | 0.90± | -     | -     | 2.98± | 18.44 | 1.79± | -     | -     | -     | 3.71± | -     |       |
| 8  |                                   |       | 0.37  |       | ±2.31 | ±2.08 | 0.37  |       | 0.14  |       |       | 0.19  | ±2.31 | 0.57  |       |       |       | 0.93  |       |       |
| 14 | 3-Methoxyacetophenone             | -     | -     | -     | -     | -     | 0.54± | -     | -     | -     | -     | -     | -     | 2.23± | -     | -     | -     | -     | -     |       |
| 9  |                                   |       |       |       |       |       | 0.18  |       |       |       |       |       |       | 0.47  |       |       |       |       |       |       |
| 15 | 3,5-Octadien-2-one                | -     | 1.25± | -     | -     | -     | -     | 0.74± | 0.47± | -     | -     | -     | -     | 2.18± | 5.67± | -     | -     | -     | -     |       |
| 0  |                                   |       | 0.27  |       |       |       |       | 0.27  | 0.03  |       |       |       |       | 0.57  | 1.06  |       |       |       |       |       |
| 15 | <i>D</i> (+)-Carvone              | 23.01 | 15.57 | 47.23 | 25.31 | 98.32 | 33.30 | 24.08 | 14.52 | 23.17 | 13.12 | 61.32 | 18.72 | 24.48 | 92.50 | 22.81 | 33.44 | -     | 31.24 | 29.80 |
| 1  |                                   | ±2.37 | ±0.37 | ±2.17 | ±2.57 | ±3.28 | ±3.21 | ±1.27 | ±2.34 | ±3.23 | ±2.18 | ±3.58 | ±1.27 | ±2.16 | ±0.57 | ±3.21 | ±2.31 | -     | ±2.18 | ±3.57 |
| 15 | Piperiton                         | -     | -     | 1.16± | 0.68± | -     | -     | 0.79± | 0.85± | -     | -     | -     | -     | 0.50± | 1.69± | -     | -     | -     | 1.29± | -     |
| 2  |                                   |       |       | 0.07  | 0.03  |       |       | 0.04  | 0.17  |       |       |       |       | 0.01  | 0.07  |       |       |       | 0.91  |       |
| 15 | $\beta$ -Lonone                   | -     | -     | -     | -     | -     | -     | -     | 1.28± | -     | -     | -     | 1.63± | 3.53± | 1.42± | -     | -     | -     | 3.20± | -     |
| 3  |                                   |       |       |       |       |       |       | 0.27  |       |       |       | 0.34  | 0.57  | 0.09  |       |       |       | 0.37  |       |       |
| 15 | 6,10,14-trimethyl-2-Pentadecanone | -     | -     | -     | -     | -     | -     | 0.63± | -     | -     | -     | -     | -     | 0.51± | -     | -     | -     | 0.67± | 0.89± | 1.23± |
| 4  |                                   |       |       |       |       |       |       | 0.04  |       |       |       |       |       | 0.18  |       |       |       | 0.14  | 0.18  | 0.67  |
| 15 | $\beta$ -Ionone                   | -     | -     | 3.92± | 4.01± | 6.30± | -     | 2.79± | 2.00± | -     | -     | -     | -     | 1.62± | -     | -     | -     | 1.21± | -     | 3.74± |
| 5  |                                   |       |       | 0.38  | 0.87  | 0.68  |       | 1.03  | 0.37  |       |       |       |       | 0.27  |       |       |       | 0.18  |       | 1.08  |
| 15 | Jasmolin I                        | -     | -     | -     | -     | 9.34± | 7.69± | 1.58± | -     | 2.00± | 5.14± | 17.54 | -     | 0.86± | 2.42± | -     | -     | -     | -     | 3.05± |
| 6  |                                   |       |       |       |       | 1.37  | 1.05  | 0.06  |       | 0.24  | 0.68  | ±2.27 |       | 0.29  | 0.37  |       |       |       |       | 0.37  |





Table S2. (continued).

| N<br>o. | Compound                           | Concentration ( $\mu\text{g/g}$ ) |                      |                      |                      |                      |                      |                      |                      |                      |                      |                      |                      |                      |                      |                      |                      |                      |                      |                      |   |
|---------|------------------------------------|-----------------------------------|----------------------|----------------------|----------------------|----------------------|----------------------|----------------------|----------------------|----------------------|----------------------|----------------------|----------------------|----------------------|----------------------|----------------------|----------------------|----------------------|----------------------|----------------------|---|
|         |                                    | WZ<br>M                           | SMQ                  | XQG                  | NFM                  | GC                   | XJ                   | XN                   | ZM                   | CX                   | HY                   | DD                   | PS                   | LZ                   | BT                   | JP                   | XC                   | LF                   | YF                   | NHE                  |   |
| 18<br>1 | $\beta$ -Terpinene                 | -                                 | -                    | -                    | 0.72 $\pm$<br>0.02   | -                    | -                    | -                    | -                    | -                    | -                    | -                    | -                    | -                    | -                    | -                    | -                    | 0.84 $\pm$<br>0.02   | 0.69 $\pm$<br>0.05   | -                    |   |
| 18<br>2 | $\alpha$ -Pinene                   | 3.05 $\pm$<br>1.02                | 8.79 $\pm$<br>1.07   | 11.36<br>$\pm$ 2.03  | 7.80 $\pm$<br>1.27   | 3.94 $\pm$<br>0.36   | 3.32 $\pm$<br>1.03   | 3.19 $\pm$<br>0.75   | 12.83<br>$\pm$ 1.45  | 5.80 $\pm$<br>0.57   | 3.59 $\pm$<br>0.37   | 3.32 $\pm$<br>0.74   | 0.87 $\pm$<br>0.18   | 0.98 $\pm$<br>0.05   | 2.23 $\pm$<br>0.43   | 1.23 $\pm$<br>0.36   | 2.36 $\pm$<br>0.27   | 1.36 $\pm$<br>0.45   | 2.77 $\pm$<br>0.14   | 0.67 $\pm$<br>0.34   |   |
| 18<br>3 | $\beta$ -Pinene                    | 8.92 $\pm$<br>0.87                | -                    | -                    | -                    | -                    | -                    | -                    | -                    | 4.95 $\pm$<br>0.96   | -                    | -                    | -                    | -                    | -                    | 7.78 $\pm$<br>0.37   | -                    | -                    | -                    | -                    |   |
| 18<br>4 | 1,3,8-p-Menthatriene               | 3.79 $\pm$<br>0.27                | -                    | 50.46<br>$\pm$ 2.37  | 4.13 $\pm$<br>1.33   | 47.41<br>$\pm$ 3.87  | 31.39<br>$\pm$ 2.1   | -                    | -                    | 6.67 $\pm$<br>0.18   | 1.92 $\pm$<br>0.24   | -                    | 1.93 $\pm$<br>0.27   | 24.05<br>$\pm$ 3.57  | 33.03<br>$\pm$ 3.14  | -                    | 4.50 $\pm$<br>0.34   | 3.29 $\pm$<br>0.21   | 4.44 $\pm$<br>0.37   | 38.29<br>$\pm$ 1.27  |   |
| 18<br>5 | 2-Isopropenyl-5-methylhex-4-enal   | -                                 | -                    | -                    | -                    | -                    | -                    | -                    | -                    | -                    | -                    | -                    | -                    | -                    | -                    | -                    | -                    | 21.75<br>$\pm$ 2.17  | -                    | -                    | - |
| 18<br>6 | 2,5,5-trimethyl-1,3,6-Heptatriene  | -                                 | -                    | -                    | -                    | -                    | -                    | -                    | -                    | -                    | -                    | -                    | -                    | -                    | -                    | -                    | -                    | 1.31 $\pm$<br>0.32   | -                    | -                    | - |
| 18<br>7 | $\beta$ -Myrcene                   | 29.22<br>$\pm$ 3.21               | 22.88<br>$\pm$ 3.27  | 17.40<br>$\pm$ 2.09  | 35.59<br>$\pm$ 1.98  | 26.17<br>$\pm$ 3.17  | 19.63<br>$\pm$ 1.98  | 17.59<br>$\pm$ 2.18  | 17.29<br>$\pm$ 2.33  | 24.22<br>$\pm$ 6.28  | 17.32<br>$\pm$ 4.29  | 55.50<br>$\pm$ 6.32  | 11.63<br>$\pm$ 3.27  | 12.96<br>$\pm$ 2.04  | 32.03<br>$\pm$ 4.16  | 25.65<br>$\pm$ 2.09  | 29.89<br>$\pm$ 3.27  | 13.90<br>$\pm$ 2.31  | 22.93<br>$\pm$ 2.32  | 30.50<br>$\pm$ 2.34  |   |
| 18<br>8 | D-Limonene                         | 803.5<br>2 $\pm$ 35.              | 754.9<br>1 $\pm$ 24. | 779.2<br>5 $\pm$ 35. | 901.3<br>4 $\pm$ 45. | 1594.<br>93 $\pm$ 24 | 843.0<br>3 $\pm$ 35. | 610.8<br>8 $\pm$ 17. | 509.6<br>7 $\pm$ 14. | 674.5<br>2 $\pm$ 32. | 439.8<br>0 $\pm$ 10. | 1330.<br>21 $\pm$ 35 | 369.7<br>7 $\pm$ 17. | 492.7<br>3 $\pm$ 20. | 2037.<br>63 $\pm$ 38 | 948.5<br>9 $\pm$ 34. | 974.5<br>9 $\pm$ 45. | 410.5<br>3 $\pm$ 17. | 855.1<br>6 $\pm$ 35. | 1069.<br>29 $\pm$ 26 |   |
| 18<br>9 | $\beta$ -Ocimene                   | 3.68 $\pm$<br>0.39                | 6.55 $\pm$<br>1.21   | 4.19 $\pm$<br>0.47   | 5.69 $\pm$<br>0.34   | 7.26 $\pm$<br>1.01   | 4.31 $\pm$<br>0.18   | 8.16 $\pm$<br>0.73   | 9.64 $\pm$<br>1.34   | 6.67 $\pm$<br>0.39   | 3.19 $\pm$<br>0.24   | 14.25<br>$\pm$ 1.28  | 11.03<br>$\pm$ 1.77  | 2.76 $\pm$<br>0.22   | 3.61 $\pm$<br>0.38   | 7.09 $\pm$<br>0.27   | 1.36 $\pm$<br>0.06   | 3.64 $\pm$<br>0.33   | 4.26 $\pm$<br>0.19   | 1.11 $\pm$<br>0.02   |   |
| 19<br>0 | 2,5,5-trimethyl-1,5-Cyclooctadiene | -                                 | -                    | -                    | -                    | -                    | -                    | -                    | -                    | -                    | 2.33 $\pm$<br>0.27   | -                    | -                    | -                    | -                    | -                    | -                    | -                    | -                    | -                    |   |
| 19<br>1 | (Z)- $\beta$ -Ocimene              | 5.57 $\pm$<br>0.68                | 3.17 $\pm$<br>0.38   | 8.94 $\pm$<br>1.06   | -                    | 7.83 $\pm$<br>2.19   | -                    | 3.39 $\pm$<br>1.06   | 2.90 $\pm$<br>0.37   | -                    | 3.09 $\pm$<br>0.57   | 16.88<br>$\pm$ 2.01  | 1.99 $\pm$<br>0.24   | -                    | 6.34 $\pm$<br>0.39   | -                    | 4.16 $\pm$<br>0.37   | 4.01 $\pm$<br>0.18   | 3.16 $\pm$<br>0.24   | 1.20 $\pm$<br>0.05   |   |

|    |                                            |       |        |       |       |       |       |       |       |       |       |       |       |       |       |       |       |       |       |       |
|----|--------------------------------------------|-------|--------|-------|-------|-------|-------|-------|-------|-------|-------|-------|-------|-------|-------|-------|-------|-------|-------|-------|
| 19 |                                            | 62.34 | 109.2  | 34.02 | 75.80 | 68.25 | 21.47 | 44.57 | 60.61 | 64.83 | 35.52 | 20.35 | 12.41 | 17.15 | 37.56 | 96.58 | 25.09 | 8.18± | 28.18 | 27.76 |
| 2  | $\gamma$ -Terpinene                        | ±5.68 | 6±7.68 | ±2.67 | ±6.32 | ±5.27 | ±2.07 | ±2.37 | ±3.24 | ±3.57 | ±2.18 | ±3.27 | ±2.18 | ±1.08 | ±2.27 | ±3.57 | ±3.74 | 1.09  | ±3.27 | ±2.19 |
| 19 |                                            |       | 6.70±  |       |       |       |       |       |       | 0.68± |       |       |       |       |       |       |       |       |       |       |
| 3  | Terpinolene                                | -     | 0.67   | -     | -     | -     | -     | -     | -     | 0.06  | -     | -     | -     | -     | -     | -     | -     | -     | -     | -     |
| 19 |                                            |       |        | 1.82± |       | 9.45± | 24.80 |       |       | 2.76± | 13.00 |       |       |       | 27.55 |       |       |       |       | 9.85± |
| 4  | Cosmene                                    | -     | -      | 0.37  | -     | 1.32  | ±2.37 | -     | -     | 0.37  | ±3.24 | -     | -     | -     | ±3.24 | -     | -     | -     | -     | 1.98  |
| 19 | 2-Methyl-3-trans-propenylpyrazi            |       |        |       |       |       |       |       |       |       |       |       |       |       | 6.12± |       |       |       |       | 2.77± |
| 5  | ne                                         | -     | -      | -     | -     | -     | -     | -     | -     | -     | -     | -     | -     | -     | 1.32  | -     | -     | -     | -     | 0.35  |
| 19 |                                            |       |        |       |       | 0.69± | 1.77± |       |       |       |       |       | 0.03± |       |       |       | 0.04± |       |       |       |
| 6  | 4-Acetyl-1-methyl-1-cyclohexene            | -     | -      | -     | -     | 0.21  | 0.68  | -     | -     | -     | -     | -     | 0.000 | -     | -     | -     | 0.000 | -     | -     | -     |
|    |                                            |       |        |       |       |       |       |       |       |       |       |       | 2     |       |       |       | 1     |       |       |       |
| 19 |                                            | 3.18± |        |       |       |       |       |       |       |       |       |       |       |       |       |       |       |       |       |       |
| 7  | 3-Carene                                   | 1.03  | -      | -     | -     | -     | -     | -     | -     | -     | -     | -     | -     | -     | -     | -     | -     | -     | -     | -     |
| 19 |                                            | 4.53± |        |       |       |       |       |       |       |       |       |       | 1.67± |       |       |       | 2.63± |       |       |       |
| 8  | 2-methyl-6-methylene-1,7-Octadie           | 0.21  | -      | -     | -     | -     | -     | -     | -     | -     | -     | -     | 0.35  | -     | -     | -     | 0.36  | -     | -     | -     |
|    | n-3-one                                    |       |        |       |       |       |       |       |       |       |       |       |       |       |       |       |       |       |       |       |
| 19 |                                            |       |        |       |       |       |       |       |       |       |       |       |       |       |       |       | 3.10± |       |       |       |
| 9  | 1,4-Pentadiene                             | -     | -      | -     | -     | -     | -     | -     | -     | -     | -     | -     | -     | -     | -     | -     | 0.37  | -     | -     | -     |
| 20 |                                            |       | 3.09±  |       |       |       |       |       |       |       |       |       |       |       |       |       |       |       |       |       |
| 0  | 1,Z-5,E-7-Dodecatriene                     | -     | 0.31   | -     | -     | -     | -     | -     | -     | -     | -     | -     | -     | -     | -     | -     | -     | -     | -     | -     |
| 20 |                                            |       |        |       |       |       |       |       |       |       |       |       |       |       | 21.51 |       |       | 1.49± |       |       |
| 1  | $\alpha$ -Humulene                         | -     | -      | -     | -     | -     | -     | -     | -     | -     | -     | ±2.35 | -     | -     | -     | -     | -     | 0.02  | -     | -     |
| 20 |                                            |       |        |       |       |       |       |       |       |       |       |       |       |       | 27.38 |       |       | 24.68 |       |       |
| 2  | <i>cis</i> - $\beta$ -Farnesene            | -     | -      | -     | -     | -     | -     | -     | -     | -     | -     | ±4.32 | -     | -     | -     | -     | -     | ±2.35 | -     | -     |
| 20 |                                            |       |        |       |       |       |       | 4.17± |       |       |       |       |       |       | 9.37± |       |       | 7.65± |       |       |
| 3  | Cyclohexene,<br>2-ethenyl-1,3,3-trimethyl- | -     | -      | -     | -     | -     | -     | 1.27  | -     | -     | -     | 2.03  | -     | -     | -     | -     | -     | 0.67  | -     | -     |

Table S2. (continued).

| N<br>o. | Compound                                                         | Concentration ( $\mu\text{g/g}$ ) |                     |                     |                     |                     |                     |                    |                    |                     |                     |                     |                    |                    |                     |                     |                    |                    |                     |                     |
|---------|------------------------------------------------------------------|-----------------------------------|---------------------|---------------------|---------------------|---------------------|---------------------|--------------------|--------------------|---------------------|---------------------|---------------------|--------------------|--------------------|---------------------|---------------------|--------------------|--------------------|---------------------|---------------------|
|         |                                                                  | WZ<br>M                           | SMQ                 | XQG                 | NFM                 | GC                  | XJ                  | XN                 | ZM                 | CX                  | HY                  | DD                  | PS                 | LZ                 | BT                  | JP                  | XC                 | LF                 | YF                  | NHE                 |
| 20<br>4 | Bicyclo[4.1.0]hept-2-ene,<br>3,7,7-trimethyl-                    | -                                 | -                   | 13.45<br>$\pm 3.27$ | 5.28 $\pm$<br>2.03  | -                   | -                   | -                  | -                  | -                   | 1.49 $\pm$<br>0.27  | -                   | -                  | -                  | -                   | 10.84<br>$\pm 2.03$ | -                  | -                  | -                   | -                   |
| 20<br>5 | Longifolene-(V4)                                                 | -                                 | -                   | 0.60 $\pm$<br>0.01  | -                   | -                   | -                   | -                  | -                  | -                   | -                   | -                   | -                  | -                  | -                   | -                   | -                  | -                  | -                   | -                   |
| 20<br>6 | $\alpha$ -Cubebene                                               | 2.85 $\pm$<br>0.32                | 5.71 $\pm$<br>1.23  | 2.14 $\pm$<br>0.32  | 3.26 $\pm$<br>1.02  | 15.85<br>$\pm 3.65$ | 6.59 $\pm$<br>1.02  | 1.74 $\pm$<br>0.36 | 1.20 $\pm$<br>0.03 | 5.66 $\pm$<br>0.57  | 2.43 $\pm$<br>0.21  | 17.01<br>$\pm 3.21$ | 1.86 $\pm$<br>0.23 | 1.97 $\pm$<br>0.21 | 10.10<br>$\pm 1.94$ | 5.43 $\pm$<br>0.37  | 1.81 $\pm$<br>0.26 | 2.16 $\pm$<br>0.07 | 2.58 $\pm$<br>0.35  | 5.60 $\pm$<br>1.03  |
| 20<br>7 | 2,6-dimethyl-2,6-Octadiene                                       | 5.16 $\pm$<br>0.24                | 2.74 $\pm$<br>0.16  | 3.92 $\pm$<br>0.35  | 5.89 $\pm$<br>1.06  | 14.92<br>$\pm 1.62$ | 2.35 $\pm$<br>0.21  | 3.62 $\pm$<br>1.23 | 2.84 $\pm$<br>0.36 | 4.18 $\pm$<br>1.06  | 2.81 $\pm$<br>0.67  | 13.85<br>$\pm 2.06$ | 2.91 $\pm$<br>0.28 | 4.53 $\pm$<br>1.03 | 10.64<br>$\pm 2.06$ | 3.73 $\pm$<br>0.67  | 6.54 $\pm$<br>1.06 | 2.43 $\pm$<br>0.24 | 6.24 $\pm$<br>0.26  | 8.19 $\pm$<br>2.14  |
| 20<br>8 | 1,6-dimethyl-1,5-Cyclooctadiene                                  | -                                 | -                   | 0.75 $\pm$<br>0.01  | -                   | -                   | -                   | -                  | -                  | -                   | 0.65 $\pm$<br>0.06  | -                   | -                  | -                  | -                   | 0.51 $\pm$<br>0.02  | -                  | -                  | -                   | -                   |
| 20<br>9 | Copaene                                                          | 3.42 $\pm$<br>0.343               | 4.95 $\pm$<br>1.03  | 1.91 $\pm$<br>0.06  | 4.30 $\pm$<br>0.37  | 8.60 $\pm$<br>1.37  | 0.70 $\pm$<br>0.02  | 2.48 $\pm$<br>1.06 | 2.35 $\pm$<br>0.16 | 4.11 $\pm$<br>0.68  | 3.07 $\pm$<br>1.26  | 12.23<br>$\pm 1.26$ | 2.50 $\pm$<br>0.24 | 2.41 $\pm$<br>0.35 | 4.37 $\pm$<br>0.34  | 5.71 $\pm$<br>0.39  | 1.87 $\pm$<br>0.34 | 2.68 $\pm$<br>0.16 | 3.64 $\pm$<br>1.03  | 5.81 $\pm$<br>0.37  |
| 21<br>0 | (-)- $\beta$ -Elemene                                            | 25.96<br>$\pm 5.64$               | 63.45<br>$\pm 6.98$ | 24.22<br>$\pm 2.15$ | 12.85<br>$\pm 2.36$ | 50.17<br>$\pm 6.37$ | 29.91<br>$\pm 6.24$ | 8.54 $\pm$<br>1.17 | 7.35 $\pm$<br>1.26 | 13.85<br>$\pm 1.35$ | 13.26<br>$\pm 2.06$ | 64.71<br>$\pm 6.49$ | 8.69 $\pm$<br>0.67 | 9.15 $\pm$<br>1.26 | 16.65<br>$\pm 2.09$ | 27.51<br>$\pm 2.18$ | 6.58 $\pm$<br>0.36 | 5.22 $\pm$<br>0.29 | 10.38<br>$\pm 1.26$ | 19.26<br>$\pm 1.32$ |
| 21<br>1 | $\beta$ -Caryophyllene                                           | 7.08 $\pm$<br>0.79                | 12.99<br>$\pm 2.06$ | 8.93 $\pm$<br>0.68  | 8.48 $\pm$<br>0.37  | 15.01<br>$\pm 1.26$ | 2.79 $\pm$<br>0.27  | 5.04 $\pm$<br>1.06 | 4.38 $\pm$<br>0.36 | 11.45<br>$\pm 2.18$ | -                   | 43.72<br>$\pm 5.18$ | 7.51 $\pm$<br>0.38 | 4.19 $\pm$<br>0.37 | 14.02<br>$\pm 1.37$ | 23.69<br>$\pm 2.19$ | 3.26 $\pm$<br>1.02 | 2.69 $\pm$<br>0.35 | 6.45 $\pm$<br>1.36  | 9.45 $\pm$<br>0.26  |
| 21<br>2 | $\alpha$ -Terpinene                                              | -                                 | -                   | -                   | -                   | -                   | -                   | -                  | -                  | -                   | 0.27 $\pm$<br>0.03  | -                   | -                  | -                  | -                   | 0.59 $\pm$<br>0.07  | -                  | -                  | -                   | -                   |
| 21<br>3 | (-)-Germacrene D                                                 | 3.63 $\pm$<br>0.64                | 16.52<br>$\pm 1.37$ | -                   | 8.77 $\pm$<br>1.24  | 8.88 $\pm$<br>0.36  | 6.79 $\pm$<br>1.02  | -                  | 2.54 $\pm$<br>0.12 | 8.59 $\pm$<br>1.36  | 20.63<br>$\pm 2.47$ | 35.59<br>$\pm 3.58$ | 1.01 $\pm$<br>0.05 | 4.13 $\pm$<br>0.34 | 5.01 $\pm$<br>1.02  | 8.43                | 0.88 $\pm$<br>0.07 | 0.93 $\pm$<br>0.12 | 5.32 $\pm$<br>1.07  | 4.76 $\pm$<br>0.25  |
| 21<br>4 | $\gamma$ -Elemene                                                | 2.55 $\pm$<br>0.54                | 8.32 $\pm$<br>1.21  | 4.48 $\pm$<br>1.21  | 4.35 $\pm$<br>0.35  | 10.83<br>$\pm 1.57$ | 8.87 $\pm$<br>1.36  | 2.37 $\pm$<br>1.27 | 1.37 $\pm$<br>0.34 | 5.78 $\pm$<br>0.15  | 9.79 $\pm$<br>1.24  | 32.98<br>$\pm 3.54$ | 2.36 $\pm$<br>0.12 | 1.55 $\pm$<br>0.07 | 3.80 $\pm$<br>0.58  | 12.80<br>$\pm 1.27$ | 0.66 $\pm$<br>0.05 | 1.09 $\pm$<br>0.08 | 1.75 $\pm$<br>0.37  | 4.42 $\pm$<br>0.57  |
| 21<br>5 | 1,1,7-Trimethyl-4-methylenedeca<br>hydro-1H-cyclopropa[e]azulene | -                                 | 1.20 $\pm$<br>0.12  | 0.77 $\pm$<br>0.04  | -                   | -                   | -                   | -                  | -                  | 0.96 $\pm$<br>0.12  | 11.63<br>$\pm 1.34$ | 9.59 $\pm$<br>1.25  | -                  | -                  | -                   | 3.28 $\pm$<br>0.15  | -                  | -                  | 1.03 $\pm$<br>0.57  | 0.84 $\pm$<br>0.05  |











|    |                                                                      |       |   |   |       |   |   |       |       |   |       |   |   |       |   |   |   |       |       |   |
|----|----------------------------------------------------------------------|-------|---|---|-------|---|---|-------|-------|---|-------|---|---|-------|---|---|---|-------|-------|---|
| 26 | 1-chloro-2-methyl-2-Butene                                           | 11.51 | - | - | -     | - | - | -     | -     | - | -     | - | - | -     | - | - | - | -     | -     | - |
| 5  |                                                                      | ±2.01 |   |   |       |   |   |       |       |   |       |   |   |       |   |   |   |       |       |   |
| 26 | 2,4,4-Trimethyl-3-hydroxymethyl-5a-(3-methyl-but-2-enyl)-cyclohexene | 1.09± | - | - | -     | - | - | -     | -     | - | -     | - | - | -     | - | - | - | -     | -     | - |
| 6  |                                                                      | 0.03  |   |   |       |   |   |       |       |   |       |   |   |       |   |   |   |       |       |   |
| 26 | 7,8-dehydro-8a-hydroxy-Isolongifolene                                | 0.63± | - | - | -     | - | - | -     | -     | - | -     | - | - | -     | - | - | - | -     | -     | - |
| 7  |                                                                      | 0.02  |   |   |       |   |   |       |       |   |       |   |   |       |   |   |   |       |       |   |
| 26 | 1-methyl-5-(1-methylethenyl)-Cyclohexene                             | -     | - | - | -     | - | - | 2.73± | 1.49± | - | 1.92± | - | - | 1.84± | - | - | - | 2.78± | 3.16± | - |
| 8  |                                                                      |       |   |   |       |   |   | 0.46  | 0.13  |   | 0.08  |   |   | 0.35  |   |   |   | 0.15  | 0.75  |   |
| 26 | Bicyclo[6.1.0]non-1-ene                                              | -     | - | - | -     | - | - | -     | 2.57± | - | -     | - | - | -     | - | - | - | -     | -     | - |
| 9  |                                                                      |       |   |   |       |   |   |       | 0.21  |   |       |   |   |       |   |   |   |       |       |   |
| 27 | 1,1-dichloro-3,4-dimethyl-Germacyclopent-3-ene                       | -     | - | - | -     | - | - | -     | -     | - | 0.77± | - | - | -     | - | - | - | -     | -     | - |
| 0  |                                                                      |       |   |   |       |   |   |       |       |   | 0.03  |   |   |       |   |   |   |       |       |   |
| 27 | Ledene oxide (I)                                                     | -     | - | - | -     | - | - | -     | -     | - | 0.43± | - | - | -     | - | - | - | -     | -     | - |
| 1  |                                                                      |       |   |   |       |   |   |       |       |   | 0.04  |   |   |       |   |   |   |       |       |   |
| 27 | Cyclohexene, 1-methyl-5-(1-methylethenyl)-, (R)-                     | -     | - | - | 3.02± | - | - | -     | -     | - | -     | - | - | -     | - | - | - | -     | -     | - |
| 2  |                                                                      |       |   |   | 0.67  |   |   |       |       |   |       |   |   |       |   |   |   |       |       |   |
| 27 | 2-Octene, 2-methyl-6-methylene-                                      | -     | - | - | 4.44± | - | - | -     | -     | - | -     | - | - | -     | - | - | - | -     | -     | - |
| 3  |                                                                      |       |   |   | 0.45  |   |   |       |       |   |       |   |   |       |   |   |   |       |       |   |
| 27 | Bicyclopentyl-1,1'-diene                                             | -     | - | - | 54.49 | - | - | -     | -     | - | -     | - | - | -     | - | - | - | -     | -     | - |
| 4  |                                                                      |       |   |   | ±2.36 |   |   |       |       |   |       |   |   |       |   |   |   |       |       |   |
| 27 | (E,E)-7,11,15-Trimethyl-3-methylene-hexadeca-1,6,10,14-tetraene      | -     | - | - | -     | - | - | -     | -     | - | -     | - | - | -     | - | - | - | 2.97± | 4.36± | - |
| 5  |                                                                      |       |   |   |       |   |   |       |       |   |       |   |   |       |   |   |   | 0.14  | 0.36  |   |

Table S2. (continued).

| N<br>o. | Compound                                     | Concentration ( $\mu\text{g/g}$ ) |               |               |                |                  |                 |    |    |               |               |    |               |    |                  |               |    |                |               |               |
|---------|----------------------------------------------|-----------------------------------|---------------|---------------|----------------|------------------|-----------------|----|----|---------------|---------------|----|---------------|----|------------------|---------------|----|----------------|---------------|---------------|
|         |                                              | WZ<br>M                           | SMQ           | XQG           | NFM            | GC               | XJ              | XN | ZM | CX            | HY            | DD | PS            | LZ | BT               | JP            | XC | LF             | YF            | NHE           |
| 27<br>6 | 1-(1,4-dimethyl-3-cyclohexen-1-yl)-Ethanone  | -                                 | -             | -             | -              | -                | -               | -  | -  | -             | -             | -  | -             | -  | -                | -             | -  | 1.98±<br>0.32  | 1.68±<br>0.12 | -             |
| 27<br>7 | Caryophyllene (I1)                           | -                                 | -             | -             | -              | -                | -               | -  | -  | -             | -             | -  | -             | -  | -                | -             | -  | -              | -             | -             |
| 27<br>8 | Tricyclo[2.2.2.0(1,4)]octane                 | -                                 | -             | -             | 0.85±<br>0.21  | -                | -               | -  | -  | -             | -             | -  | -             | -  | -                | -             | -  | -              | -             | -             |
| 27<br>9 | Alloaromadendrene oxide-(1)                  | -                                 | -             | -             | -              | -                | -               | -  | -  | -             | -             | -  | -             | -  | -                | 1.34±         | -  | -              | -             | -             |
| 28<br>0 | Ethylene oxide                               | -                                 | 0.43±         | -             | -              | -                | -               | -  | -  | -             | -             | -  | -             | -  | -                | -             | -  | -              | -             | -             |
| 28<br>1 | Tricyclo[4.4.1.0(1,6)]undecane               | -                                 | 0.59±<br>0.06 | -             | 43.46<br>±4.29 | -                | -               | -  | -  | -             | -             | -  | -             | -  | -                | -             | -  | 54.77<br>±7.21 | -             | -             |
| 28<br>2 | 2,3-Epoxy-pinane                             | 55.27<br>±6.25                    | -             | -             | -              | 219.6<br>9±15.21 | 125.3<br>2±7.64 | -  | -  | -             | -             | -  | -             | -  | 202.2<br>8±16.24 | -             | -  | -              | -             | -             |
| 28<br>3 | 7-(1-methylethylidene)-Bicyclo[4.1.0]heptane | -                                 | -             | -             | -              | 3.70±<br>0.23    | 1.02±<br>0.12   | -  | -  | -             | 0.30±<br>0.01 | -  | -             | -  | -                | -             | -  | -              | -             | -             |
| 28<br>4 | 8-(1-methylethylidene)-Bicyclo[5.1.0]octane  | -                                 | -             | -             | -              | -                | -               | -  | -  | 0.45±<br>0.08 | -             | -  | -             | -  | -                | -             | -  | -              | -             | -             |
| 28<br>5 | Isoaromadendrene epoxide                     | 0.70±<br>0.02                     | 3.21±<br>0.23 | 2.28±<br>0.64 | -              | 2.53±<br>0.12    | 1.36±<br>0.11   | -  | -  | -             | -             | -  | 0.77±<br>0.31 | -  | -                | 0.91±<br>0.08 | -  | -              | -             | 0.91±<br>0.02 |





|    |                                                                                             |       |       |       |       |       |       |       |       |       |       |   |       |       |       |       |       |       |   |   |
|----|---------------------------------------------------------------------------------------------|-------|-------|-------|-------|-------|-------|-------|-------|-------|-------|---|-------|-------|-------|-------|-------|-------|---|---|
| 30 | 7-Chloro-2,3-dihydro-3-(4-N,N-dimethylaminobenzylidene)-5-phenyl-1H-1,4-benzodiazepin-2-one | -     | -     | -     | 1.13± | -     | -     | 1.08± | 0.19± | -     | -     | - | -     | -     | -     | -     | -     | -     | - | - |
| 9  |                                                                                             |       |       |       | 0.02  |       |       | 0.32  | 0.001 |       |       |   |       |       |       |       |       |       |   |   |
| 31 | 2-Chloro-4-(4-methoxyphenyl)-6-(4-nitrophenyl)pyrimidine                                    | -     | 0.75± | -     | -     | -     | -     | -     | -     | -     | -     | - | -     | -     | -     | -     | 0.76± | -     | - | - |
| 0  |                                                                                             |       | 0.01  |       |       |       |       |       |       |       |       |   |       |       |       |       | 0.02  |       |   |   |
| 31 | 3,5-Di-tert-butylcatechol                                                                   | -     | 0.79± | -     | -     | -     | -     | -     | -     | -     | -     | - | -     | -     | -     | -     | -     | -     | - | - |
| 1  |                                                                                             |       | 0.01  |       |       |       |       |       |       |       |       |   |       |       |       |       |       |       |   |   |
| 31 | 4-ethyl-2-methoxy-Phenol                                                                    | -     | -     | -     | -     | 11.65 | 9.48± | -     | -     | -     | -     | - | -     | -     | -     | -     | -     | -     | - | - |
| 2  |                                                                                             |       |       |       |       | ±1.03 | 1.32  |       |       |       |       |   |       |       |       |       |       |       |   |   |
| 31 | 3-Methyl-4-isopropylphenol                                                                  | 8.71± | 31.91 | -     | -     | 66.93 | 39.90 | -     | -     | 5.75± | 10.45 | - | -     | 18.70 | 23.51 | -     | 1.65± | 0.78± | - |   |
| 3  |                                                                                             | 1.32  | ±4.65 |       |       | ±2.31 | ±3.25 |       |       | 0.64  | ±2.01 |   |       | ±1.36 | ±3.26 |       | 0.35  | 0.08  |   |   |
| 31 | 2-Methoxy-4-vinylphenol                                                                     | -     | -     | 2.23  | -     | 193.9 | 65.61 | -     | 3.07± | 2.45± | -     | - | 1.48± | 113.7 | -     | -     | -     | -     | - |   |
| 4  |                                                                                             |       |       |       |       | 5±7.3 | ±3.64 |       | 0.32  | 0.36  |       |   | 0.23  | 8±9.3 | -     | -     | -     | -     | - |   |
|    |                                                                                             |       |       |       |       | 6     |       |       |       |       |       |   |       | 4     |       |       |       |       |   |   |
| 31 | 9-Amino-7-mercapto-5,6,8,10-tetraaaza-benzo[b]fluoren-11-one                                | -     | -     | 1.21± | -     | -     | -     | 0.53± | -     | -     | -     | - | -     | -     | -     | -     | -     | -     | - |   |
| 5  |                                                                                             |       |       | 0.03  |       |       |       | 0.01  |       |       |       |   |       |       |       |       |       |       |   |   |
| 31 | 4-methyl-Benzamide                                                                          | -     | -     | -     | -     | 3.80± | 1.36± | -     | -     | -     | -     | - | -     | -     | -     | -     | -     | -     | - |   |
| 6  |                                                                                             |       |       |       |       | 0.12  | 0.26  |       |       |       |       |   |       |       |       |       |       |       |   |   |
| 31 | Durophenol                                                                                  | -     | -     | -     | -     | 31.40 | 16.98 | -     | -     | -     | -     | - | 1.42± | -     | -     | 1.54± | -     | -     | - |   |
| 7  |                                                                                             |       |       |       |       | ±3.68 | ±1.32 |       |       |       |       |   | 0.05  |       |       | 0.01  |       |       |   |   |

Table S2. (continued).

| N<br>o. | Compound                         | Concentration (µg/g) |     |       |     |    |    |    |    |    |    |    |    |    |       |    |       |       |    |     |
|---------|----------------------------------|----------------------|-----|-------|-----|----|----|----|----|----|----|----|----|----|-------|----|-------|-------|----|-----|
|         |                                  | WZ<br>M              | SMQ | XQG   | NFM | GC | XJ | XN | ZM | CX | HY | DD | PS | LZ | BT    | JP | XC    | LF    | YF | NHE |
| 31      | (2-Nonyloxy-benzyl)-phenyl-amine | -                    | -   | 5.96± | -   | -  | -  | -  | -  | -  | -  | -  | -  | -  | -     | -  | -     | -     | -  |     |
| 8       |                                  |                      |     | 0.32  |     |    |    |    |    |    |    |    |    |    |       |    |       |       |    |     |
| 31      | 13H-Dibenzo[a,i]carbazole        | -                    | -   | -     | -   | -  | -  | -  | -  | -  | -  | -  | -  | -  | 2.15± | -  | 1.17± | 0.68± | -  |     |
| 9       |                                  |                      |     |       |     |    |    |    |    |    |    |    |    |    | 0.32  |    | 0.32  | 0.02  |    |     |

|    |                                                                            |       |   |       |   |       |       |   |   |   |   |   |   |       |       |       |       |       |       |
|----|----------------------------------------------------------------------------|-------|---|-------|---|-------|-------|---|---|---|---|---|---|-------|-------|-------|-------|-------|-------|
| 32 | 2-[1-(2-phenylethyl)-2-benzimidazolymethylthio]-Benzothiazole              | -     | - | -     | - | -     | -     | - | - | - | - | - | - | -     | 1.17± | -     | -     | -     | -     |
| 0  |                                                                            |       |   |       |   |       |       |   |   |   |   |   |   |       | 0.02  |       |       |       |       |
| 32 | 5-ethyl-3-(3-methyl-5-phenylpyrazol-1-yl)-1,2,4-Triazol-4-amine            | 1.34± | - | -     | - | -     | -     | - | - | - | - | - | - | -     | -     | -     | -     | -     | -     |
| 1  |                                                                            | 0.01  |   |       |   |       |       |   |   |   |   |   |   |       |       |       |       |       |       |
| 32 | 2-Nitrobenzenesulfonohydrazide                                             | -     | - | -     | - | -     | -     | - | - | - | - | - | - | 3.12± | -     | -     | -     | -     | -     |
| 2  |                                                                            |       |   |       |   |       |       |   |   |   |   |   |   | 0.12  |       |       |       |       |       |
| 32 | 1,3-dimethyl-5,6-dimethoxy-2-(3,5-dimethoxyphenyl)-1H-Indole               | -     | - | -     | - | -     | -     | - | - | - | - | - | - | -     | -     | -     | 0.61± | 1.23± | -     |
| 3  |                                                                            |       |   |       |   |       |       |   |   |   |   |   |   |       |       | 0.01  | 0.003 |       |       |
| 32 | N-[4-[1-(3-trifluoromethylbenzyl)-2-benzimidazolyl]-3-furazanyl]-Acetamide | -     | - | -     | - | -     | -     | - | - | - | - | - | - | 3.55± | -     | -     | -     | -     | -     |
| 4  |                                                                            |       |   |       |   |       |       |   |   |   |   |   |   | 0.32  |       |       |       |       |       |
| 32 | 2-Amino-4-hydroxy-6-phenethylpteridine                                     | -     | - | -     | - | -     | -     | - | - | - | - | - | - | -     | -     | 0.73± | -     | -     | -     |
| 5  |                                                                            |       |   |       |   |       |       |   |   |   |   |   |   |       | 0.03  |       |       |       |       |
| 32 | 2-ethyl-4,5-dimethyl-Phenol                                                | -     | - | -     | - | -     | -     | - | - | - | - | - | - | -     | -     | 4.06± | -     | -     | -     |
| 6  |                                                                            |       |   |       |   |       |       |   |   |   |   |   |   |       | 0.68  |       |       |       |       |
| 32 | 2,4-dimethyl-Benzo[h]quinoline                                             | -     | - | -     | - | -     | -     | - | - | - | - | - | - | -     | -     | -     | 10.65 | 12.31 | -     |
| 7  |                                                                            |       |   |       |   |       |       |   |   |   |   |   |   |       |       |       | ±1.32 | ±2.31 |       |
| 32 | 2-(4-Methoxy-phenoxy)-6-methyl-4-phenyl-quinazoline                        | -     | - | -     | - | -     | -     | - | - | - | - | - | - | -     | -     | -     | 2.32± | 1.29± | -     |
| 8  |                                                                            |       |   |       |   |       |       |   |   |   |   |   |   |       |       |       | 0.06  | 0.31  |       |
| 32 | N-[4-(1-methylethyl)benzylidene]-4-(1-pyrrolidylsulfonyl)-Benzamine        | -     | - | -     | - | -     | -     | - | - | - | - | - | - | -     | -     | -     | 0.12± | 0.67± | -     |
| 9  |                                                                            |       |   |       |   |       |       |   |   |   |   |   |   |       |       |       | 0.001 | 0.01  |       |
| 33 | 5-(3-aminopropyl)-5,10-dihydro-1H-Dibenzo[b,e][1,4]diazepin-11-one         | -     | - | -     | - | -     | -     | - | - | - | - | - | - | -     | -     | -     | -     | 1.21± | 0.31± |
| 0  |                                                                            |       |   |       |   |       |       |   |   |   |   |   |   |       |       |       | 0.23  | 0.01  |       |
|    | Others                                                                     |       |   |       |   |       |       |   |   |   |   |   |   |       |       |       |       |       |       |
| 33 | Dimethyl ether                                                             | -     | - | 10.13 | - | 1.36± | 2.54± | - | - | - | - | - | - | -     | -     | 1.01± | -     | -     | -     |
| 1  |                                                                            |       |   | ±0.31 |   | 0.04  | 0.05  |   |   |   |   |   |   |       |       | 0.02  |       |       |       |





|    |                                                                       |       |   |       |       |       |       |       |       |   |   |   |   |   |       |   |       |       |   |   |
|----|-----------------------------------------------------------------------|-------|---|-------|-------|-------|-------|-------|-------|---|---|---|---|---|-------|---|-------|-------|---|---|
| 34 |                                                                       |       |   |       |       |       |       |       | 1.75± |   |   |   |   |   |       |   |       |       |   |   |
| 3  | N-Benzylformamide                                                     | -     | - | -     | -     | -     | -     | -     | 0.21  | - | - | - | - | - | -     | - | -     | -     | - | - |
| 34 |                                                                       |       |   |       |       |       |       |       |       |   |   |   |   |   |       |   |       |       |   |   |
| 4  | 5H-Naphtho[2,3-c]carbazole                                            | -     | - | 3.92± | -     | -     | 0.99± | -     | -     | - | - | - | - | - | -     | - | -     | -     | - | - |
|    |                                                                       |       |   | 0.24  |       |       | 0.01  |       |       |   |   |   |   |   |       |   |       |       |   |   |
| 34 |                                                                       |       |   |       |       |       |       |       |       |   |   |   |   |   |       |   |       |       |   |   |
| 5  | 1-methyl-1H-Pyrazole                                                  | -     | - | -     | -     | -     | -     | -     | -     | - | - | - | - | - | 1.47± | - | -     | -     | - | - |
|    |                                                                       |       |   |       |       |       |       |       |       |   |   |   |   |   | 0.01  |   |       |       |   |   |
| 34 |                                                                       |       |   |       |       |       |       |       |       |   |   |   |   |   |       |   |       |       |   |   |
| 6  | 1-(5-trifluoromethyl-2-pyridyl)-4-(1H-pyrrol-1-yl)-Piperidine         | -     | - | -     | 1.40± | -     | -     | -     | -     | - | - | - | - | - | 0.75± | - | -     | -     | - | - |
|    |                                                                       |       |   |       | 0.03  |       |       |       |       |   |   |   |   |   | 0.02  |   |       |       |   |   |
| 34 |                                                                       |       |   |       |       |       |       |       |       |   |   |   |   |   |       |   |       |       |   |   |
| 7  | (2-Aziridinyloethyl)amine                                             | -     | - | -     | -     | -     | -     | -     | -     | - | - | - | - | - | 0.78± | - | -     | -     | - | - |
|    |                                                                       |       |   |       |       |       |       |       |       |   |   |   |   |   | 0.12  |   |       |       |   |   |
| 34 |                                                                       |       |   |       |       |       |       |       |       |   |   |   |   |   |       |   |       |       |   |   |
| 8  | 1-ethyl-1H-Pyrrole-2-carboxaldehyde                                   | -     | - | -     | -     | 3.45± | 2.77± | -     | -     | - | - | - | - | - | -     | - | -     | -     | - | - |
|    |                                                                       |       |   |       |       | 0.42  | 0.35  |       |       |   |   |   |   |   |       |   |       |       |   |   |
| 34 |                                                                       |       |   |       |       |       |       |       |       |   |   |   |   |   |       |   |       |       |   |   |
| 9  | 5-methyl-1H-Indole                                                    | -     | - | -     | -     | -     | 0.79± | -     | -     | - | - | - | - | - | -     | - | -     | -     | - | - |
|    |                                                                       |       |   |       |       |       | 0.01  |       |       |   |   |   |   |   |       |   |       |       |   |   |
| 35 |                                                                       |       |   |       |       |       |       |       |       |   |   |   |   |   |       |   |       |       |   |   |
| 0  | 2-[N-Aziridyl]methylpyrrole                                           | -     | - | -     | -     | 0.69± | 1.49± | -     | -     | - | - | - | - | - | -     | - | -     | -     | - | - |
|    |                                                                       |       |   |       |       | 0.03  | 0.24  |       |       |   |   |   |   |   |       |   |       |       |   |   |
| 35 |                                                                       |       |   |       |       |       |       |       |       |   |   |   |   |   |       |   |       |       |   |   |
| 1  | 2-(methylamino)-Ethanol                                               | 0.59± | - | -     | -     | -     | -     | -     | 1.57± | - | - | - | - | - | -     | - | -     | -     | - | - |
|    |                                                                       | 0.04  |   |       |       |       |       |       | 0.12  |   |   |   |   |   |       |   |       |       |   |   |
| 35 |                                                                       |       |   |       |       |       |       |       |       |   |   |   |   |   |       |   |       |       |   |   |
| 2  | Betazole                                                              | 0.94± | - | -     | -     | -     | -     | -     | -     | - | - | - | - | - | -     | - | -     | -     | - | - |
|    |                                                                       | 0.03  |   |       |       |       |       |       |       |   |   |   |   |   |       |   |       |       |   |   |
| 35 |                                                                       |       |   |       |       |       |       |       |       |   |   |   |   |   |       |   |       |       |   |   |
| 3  | 9-Vinylcarbazole                                                      | -     | - | -     | -     | -     | -     | 2.55± | -     | - | - | - | - | - | -     | - | -     | -     | - | - |
|    |                                                                       |       |   |       |       |       |       | 0.34  |       |   |   |   |   |   |       |   |       |       |   |   |
| 35 |                                                                       |       |   |       |       |       |       |       |       |   |   |   |   |   |       |   |       |       |   |   |
| 4  | 2-Propanamine                                                         | -     | - | -     | -     | -     | -     | -     | 0.51± | - | - | - | - | - | -     | - | -     | -     | - | - |
|    |                                                                       |       |   |       |       |       |       |       | 0.01  |   |   |   |   |   |       |   |       |       |   |   |
| 35 |                                                                       |       |   |       |       |       |       |       |       |   |   |   |   |   |       |   |       |       |   |   |
| 5  | 1,2-Hydrazinedicarboxamide                                            | -     | - | -     | -     | -     | -     | -     | 1.39± | - | - | - | - | - | -     | - | -     | -     | - | - |
|    |                                                                       |       |   |       |       |       |       |       | 0.12  |   |   |   |   |   |       |   |       |       |   |   |
| 35 |                                                                       |       |   |       |       |       |       |       |       |   |   |   |   |   |       |   |       |       |   |   |
| 6  | 1-(1,1-Dioxo-tetrahydro-1.lambda.(6)-thiophene-3-sulfonyl)-piperidine | -     | - | -     | -     | -     | -     | -     | -     | - | - | - | - | - | -     | - | 5.13± | 4.21± | - | - |
|    |                                                                       |       |   |       |       |       |       |       |       |   |   |   |   |   |       |   | 0.17  | 0.12  |   |   |



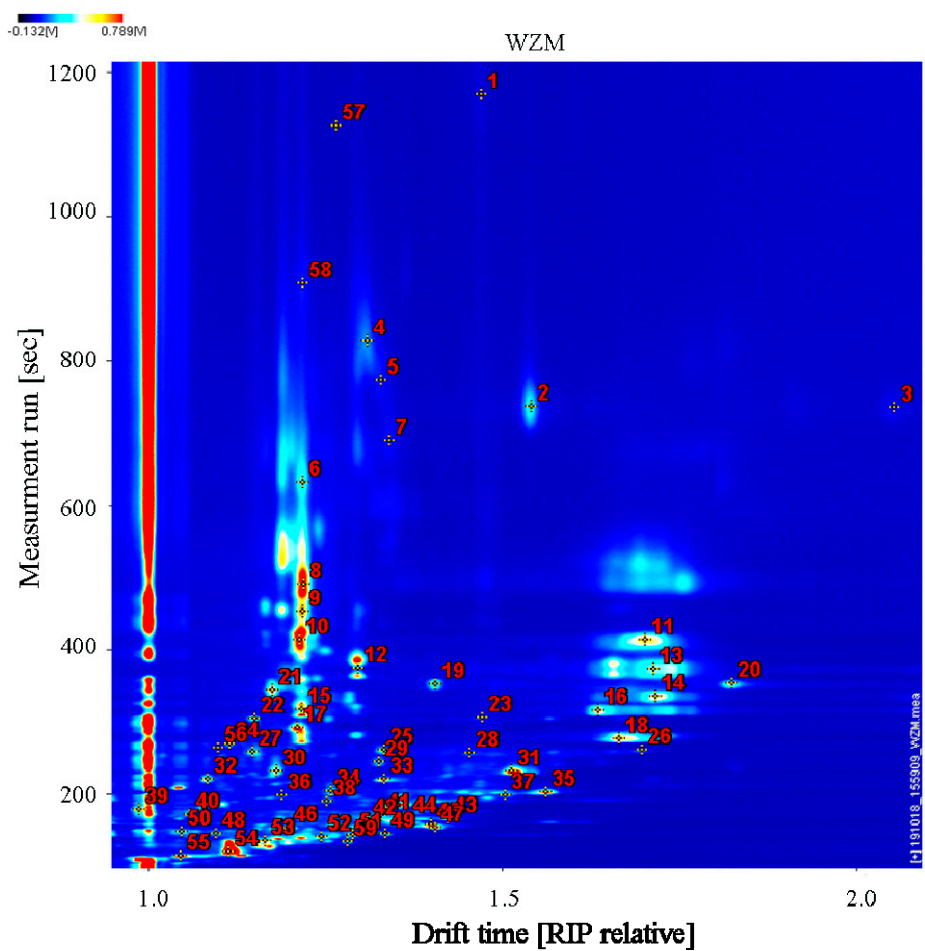

Figure S1. Ion migration spectra of WZM. The numbers are the identified volatile components.

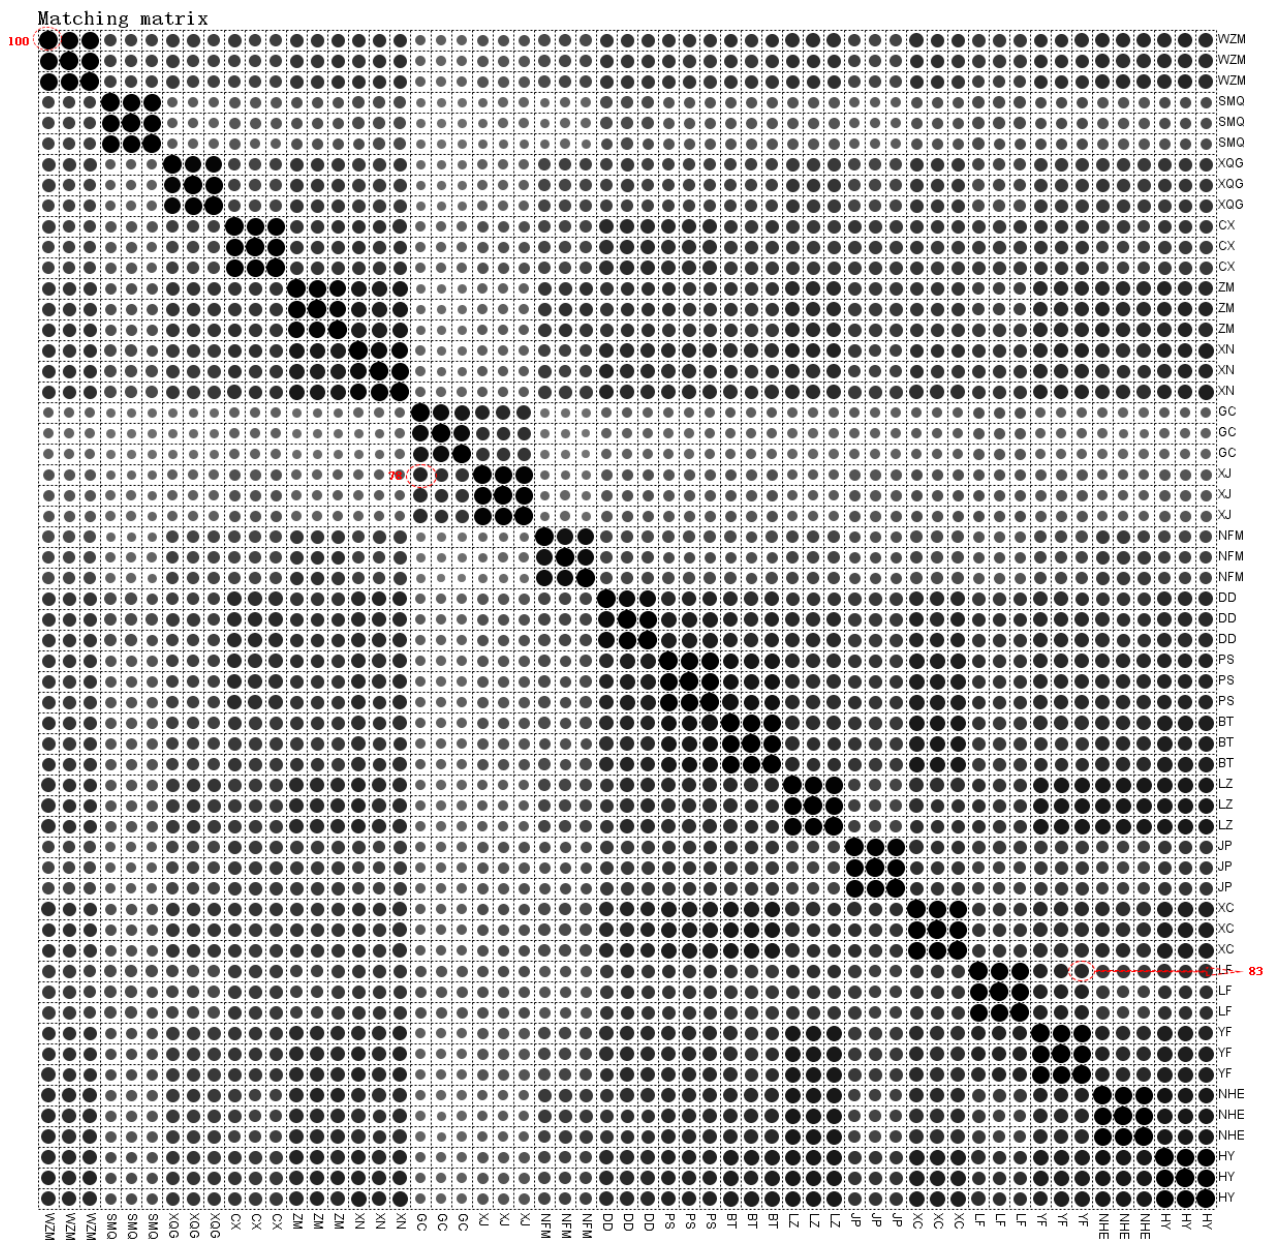

Figure S2. Similarity between samples of citrus-tea; the larger the dot, the higher the similarity.





B

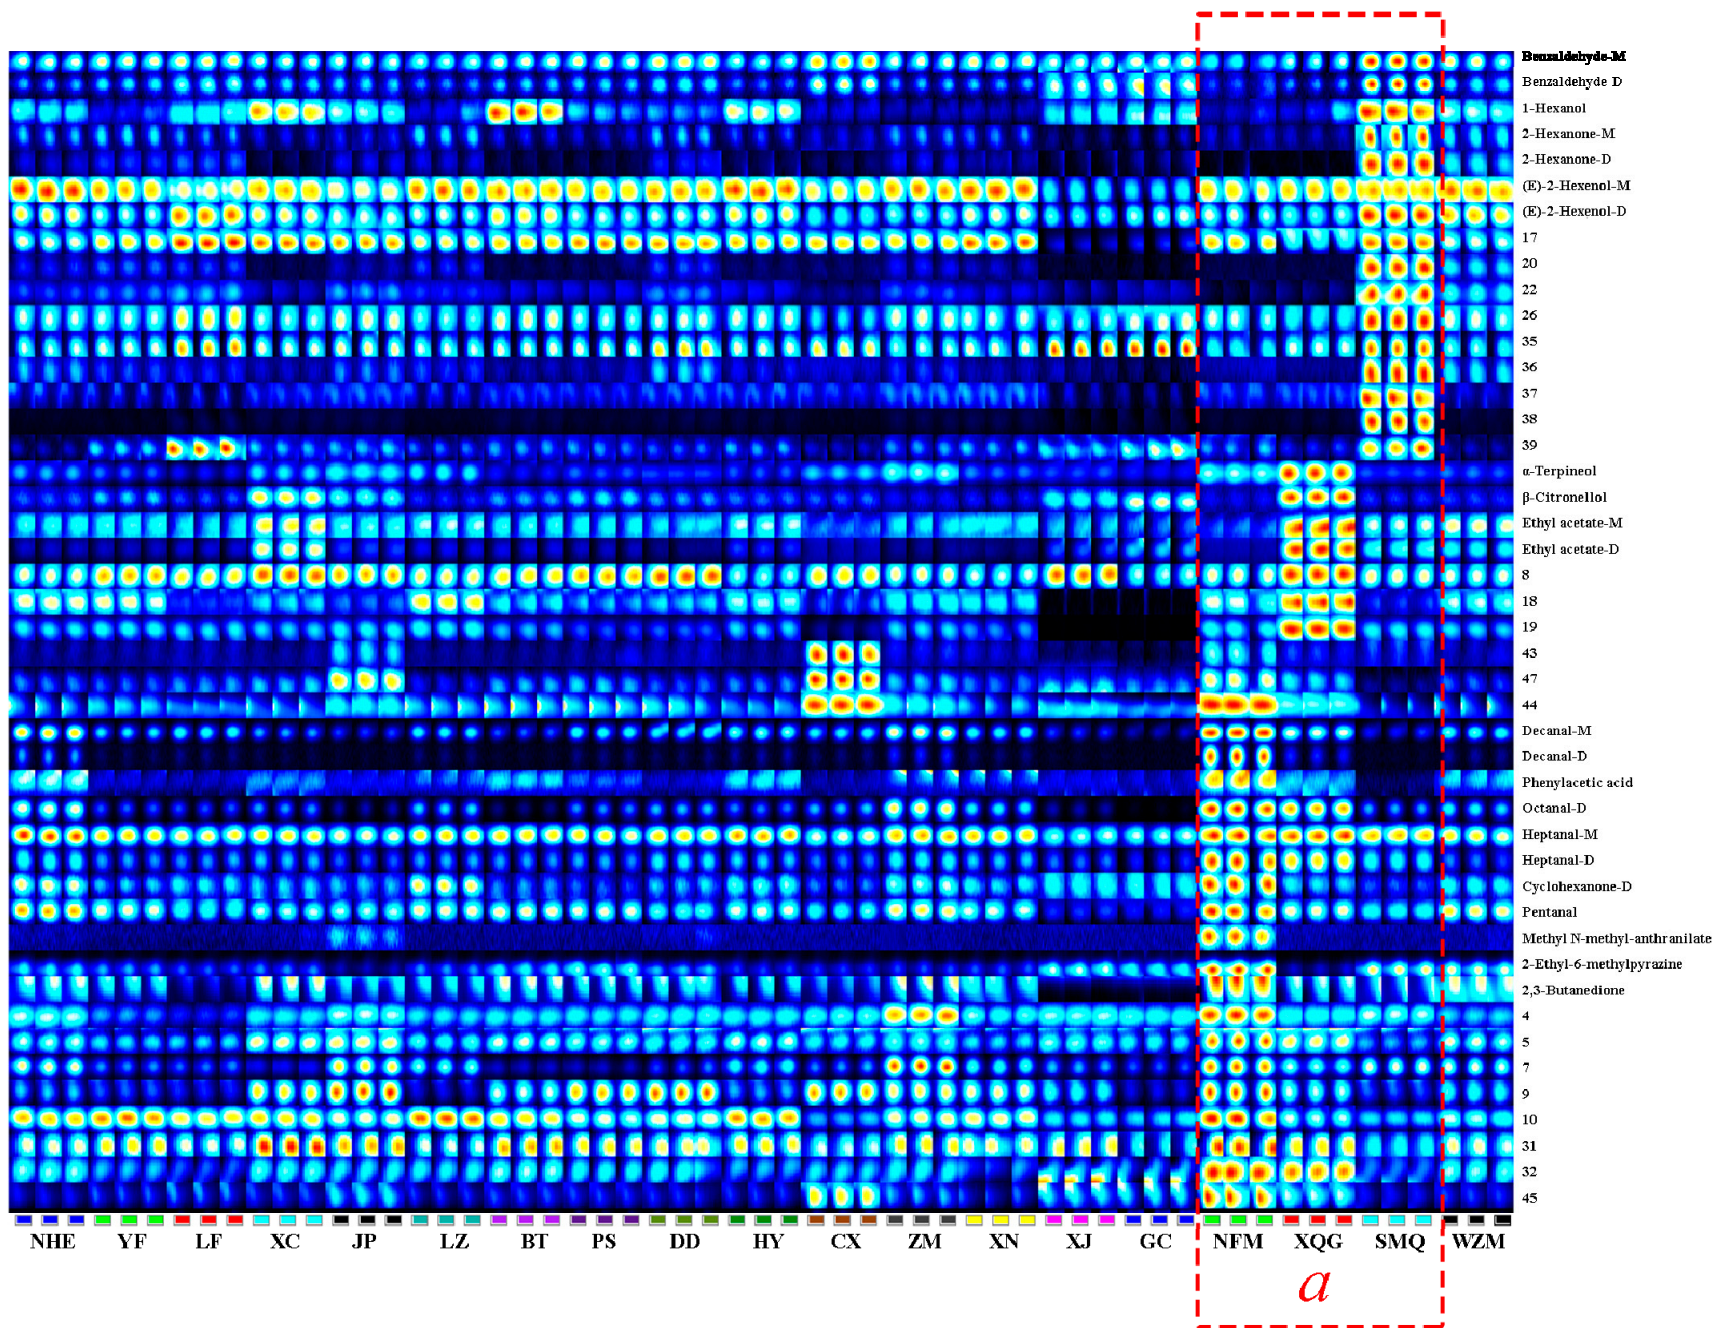

C

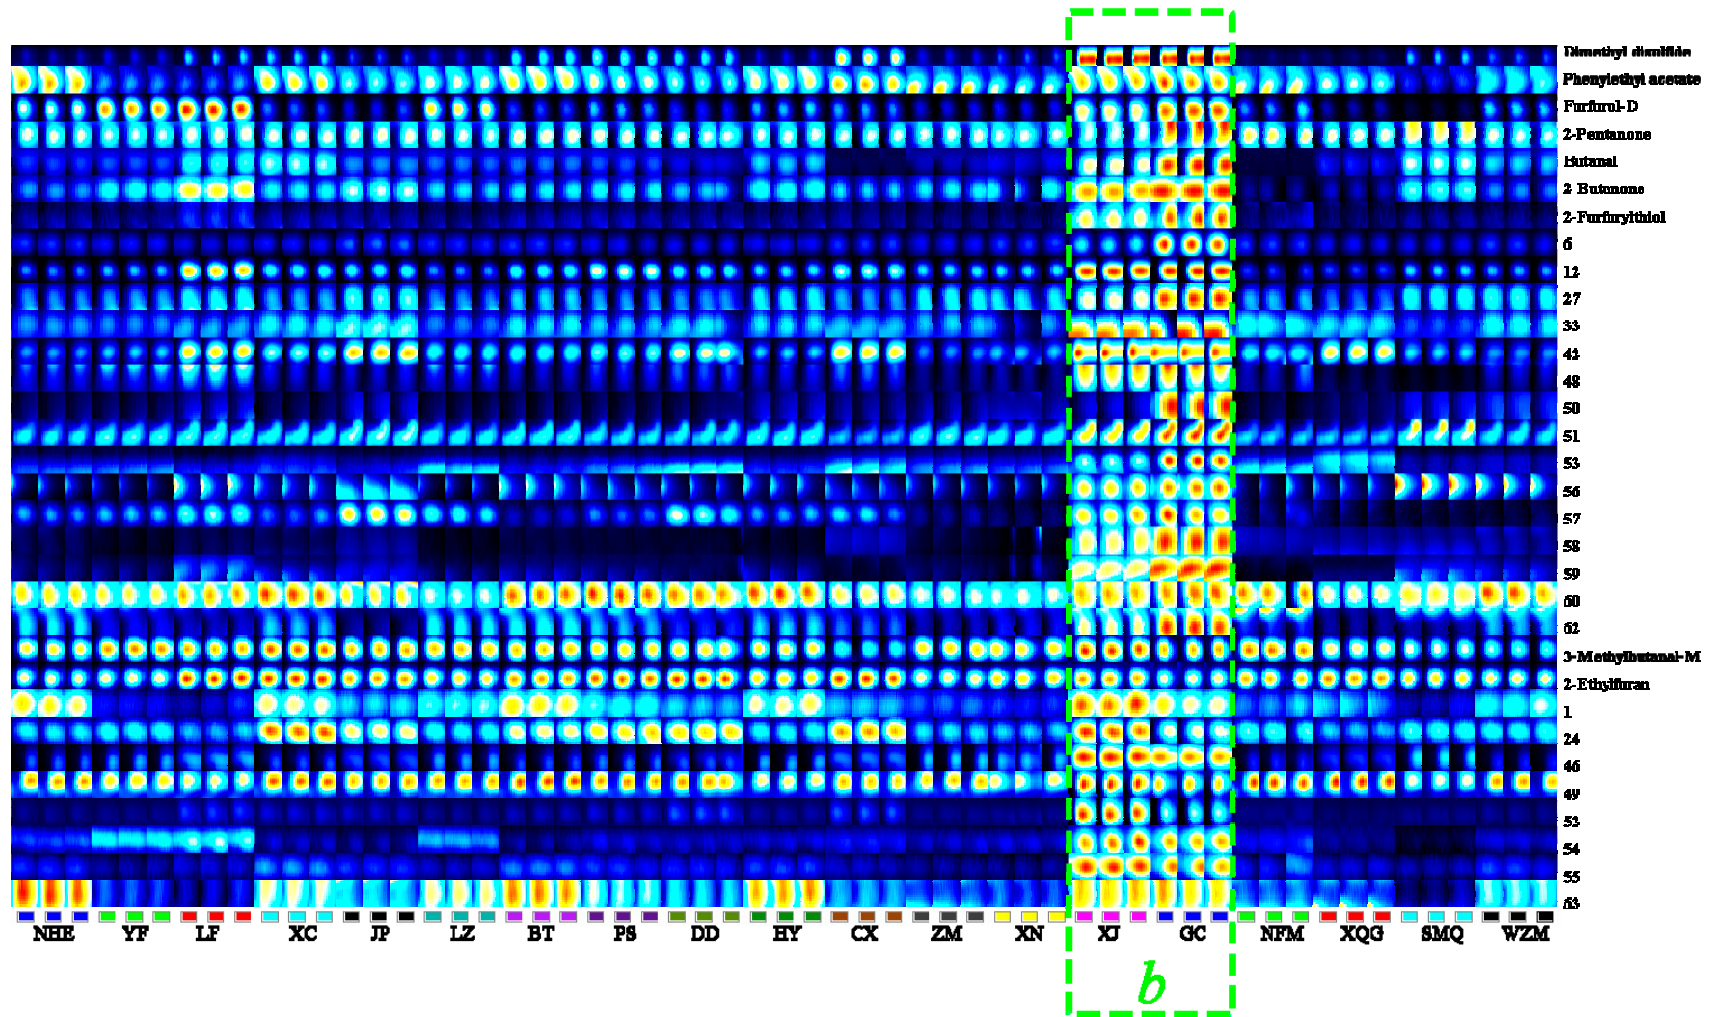



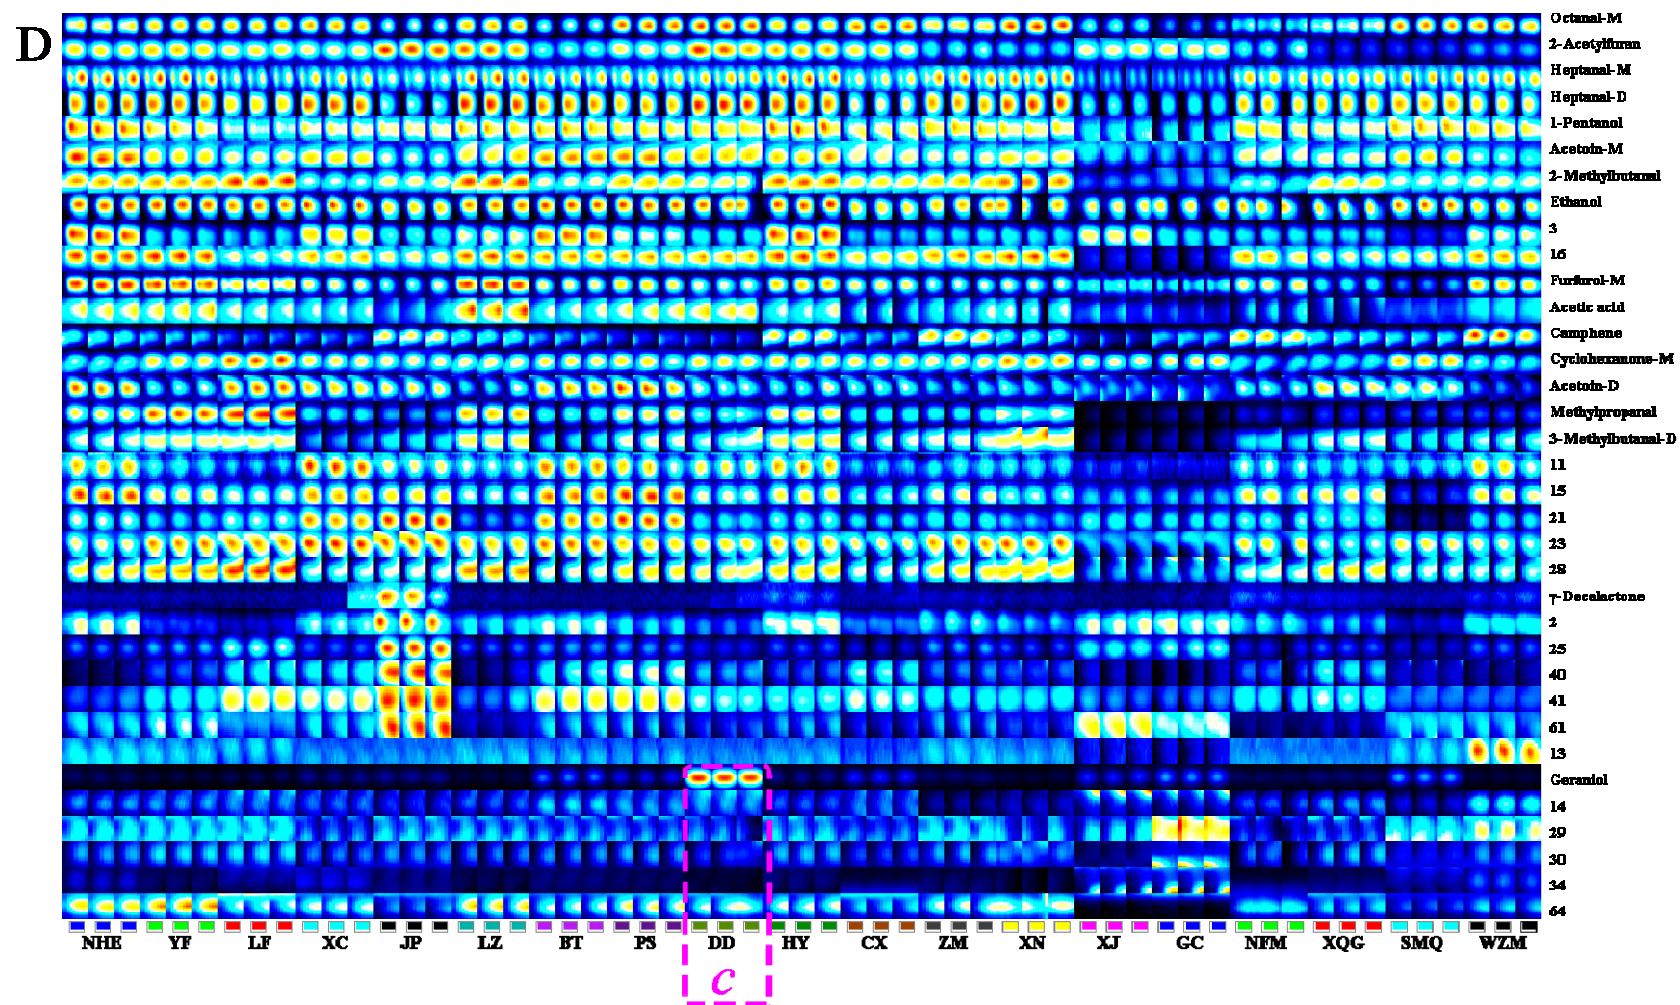

**Figure S3.** Four parts of the screenshots from the Gallery Plot fingerprints. Eleven kinds of identified peaks (a); 22 kinds of identified peaks (b); 9 kinds of identified peaks (c); 17 kinds of identified peaks (d).
